# Supplementary material for: Impact and cost-effectiveness of measles vaccination through microarray patches in 70 low-income and middle-income countries: mathematical modelling and early-stage economic evaluation
Source: PubMed Central journal article supplement (PMC10649680; doi:10.1136/bmjgh-2023-012204), 2023-11-10

# Afghanistan

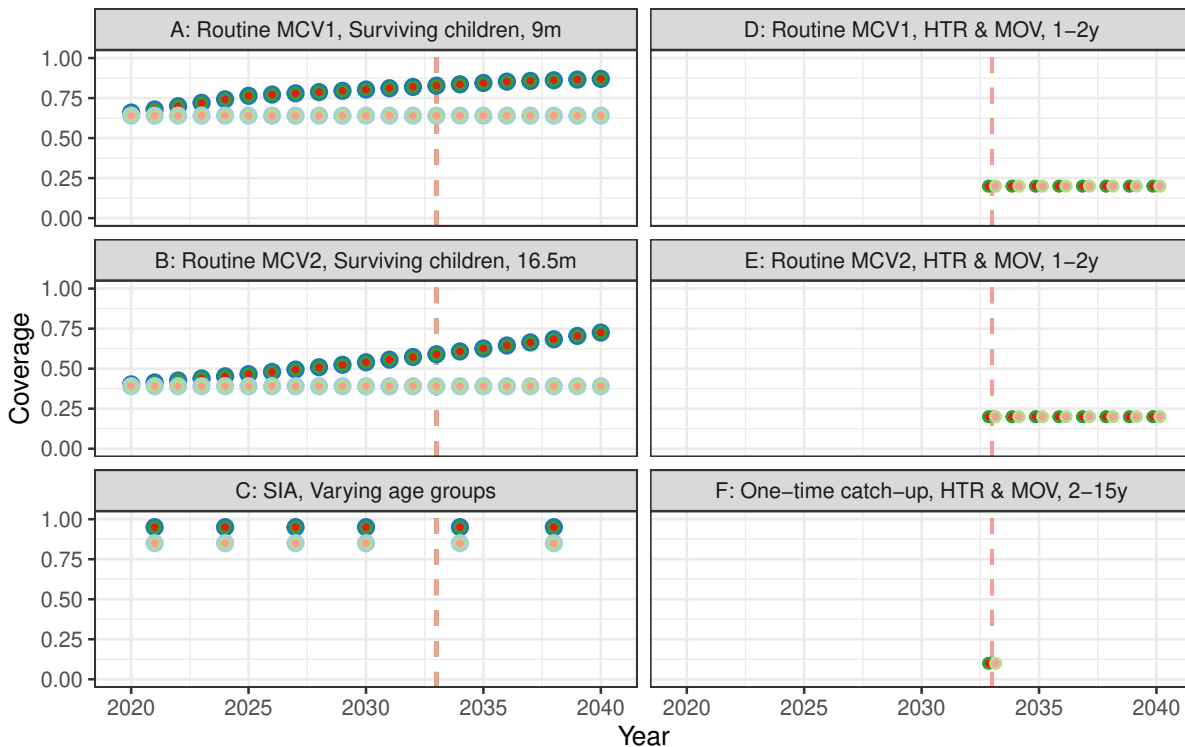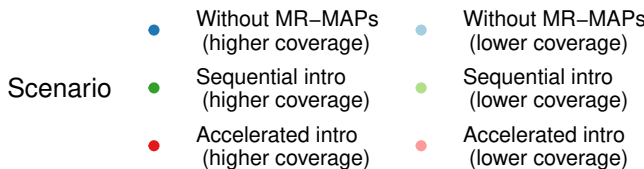

# Algeria

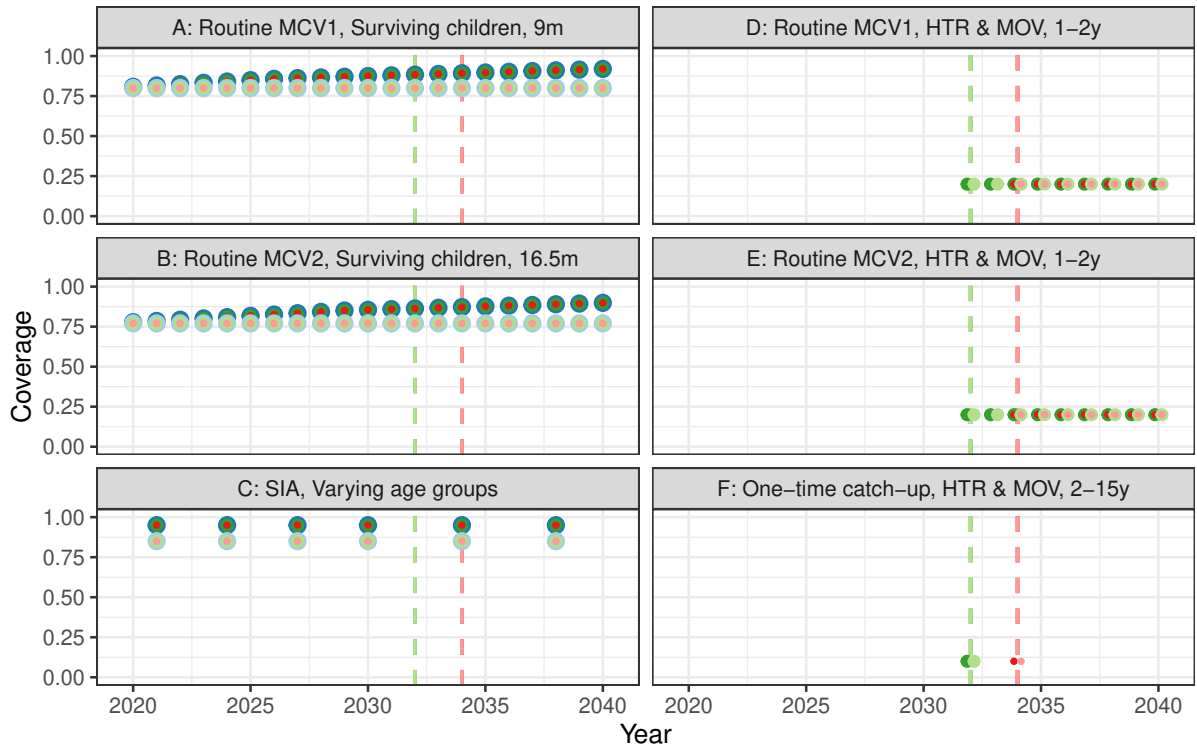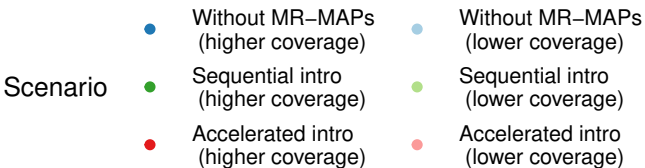

# Angola

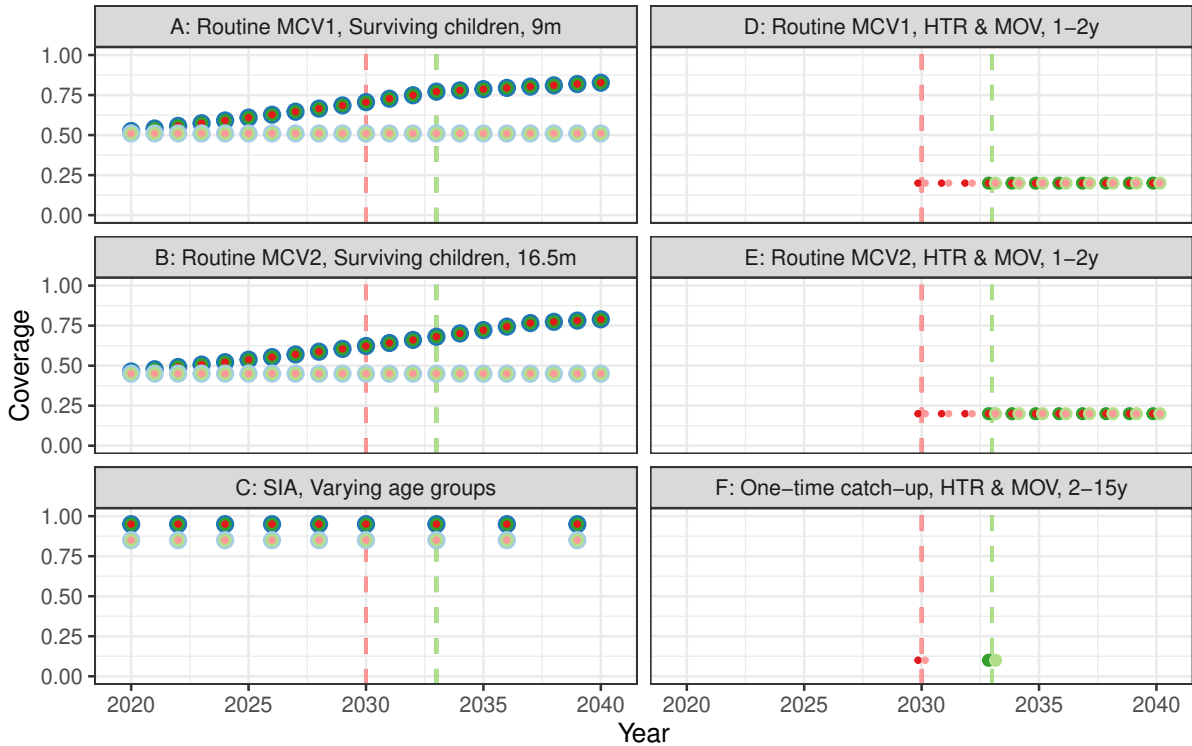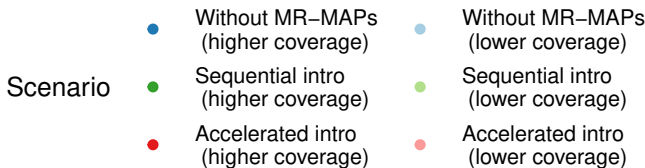

# Bangladesh

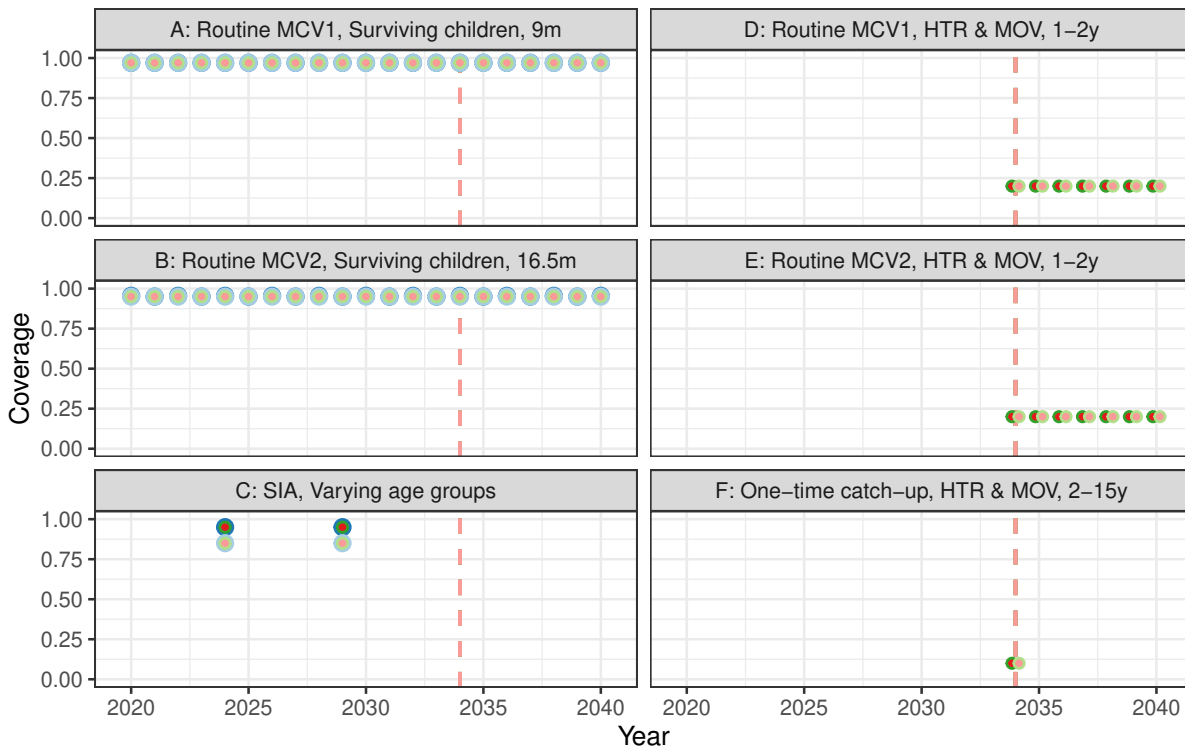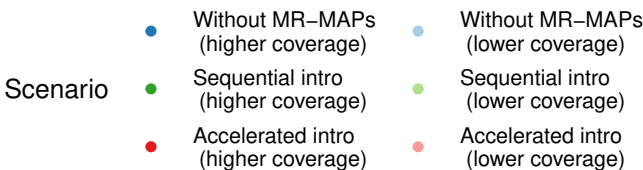

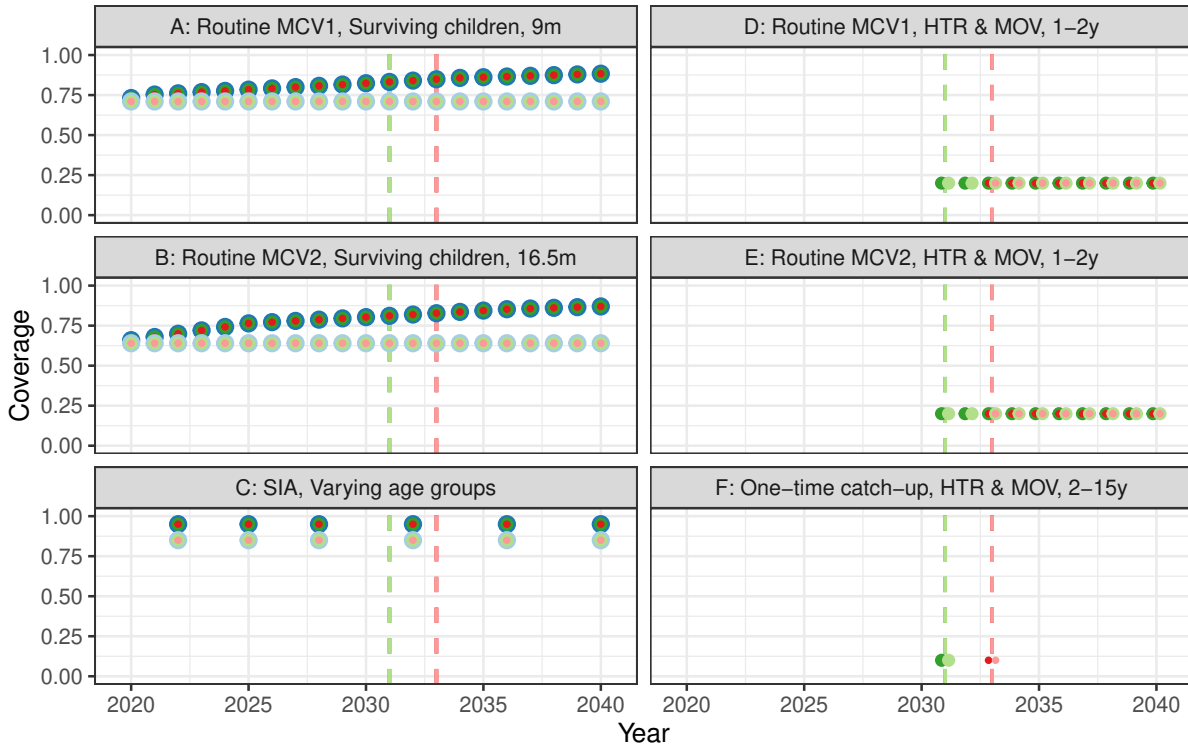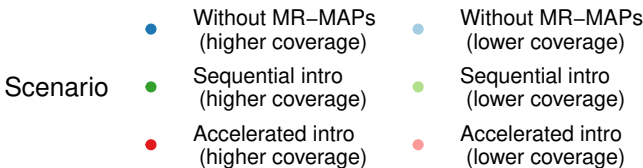

# Bosnia and Herzegovina

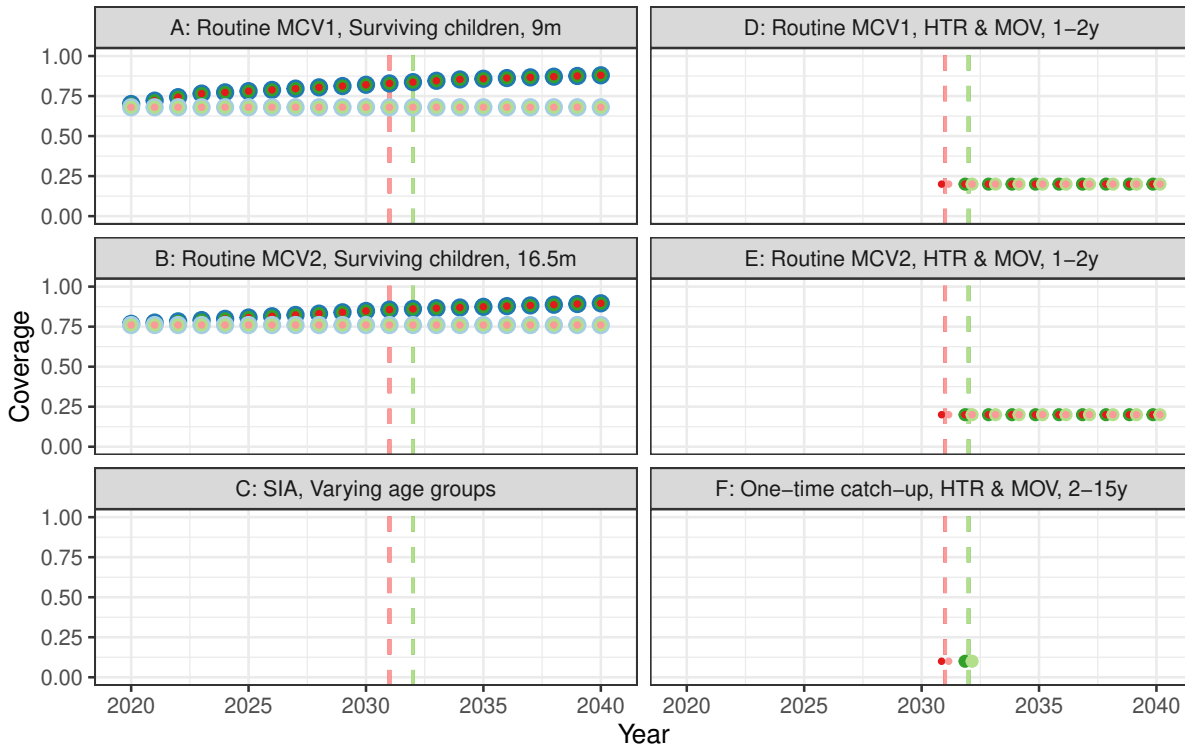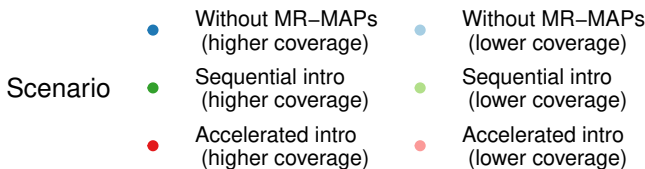

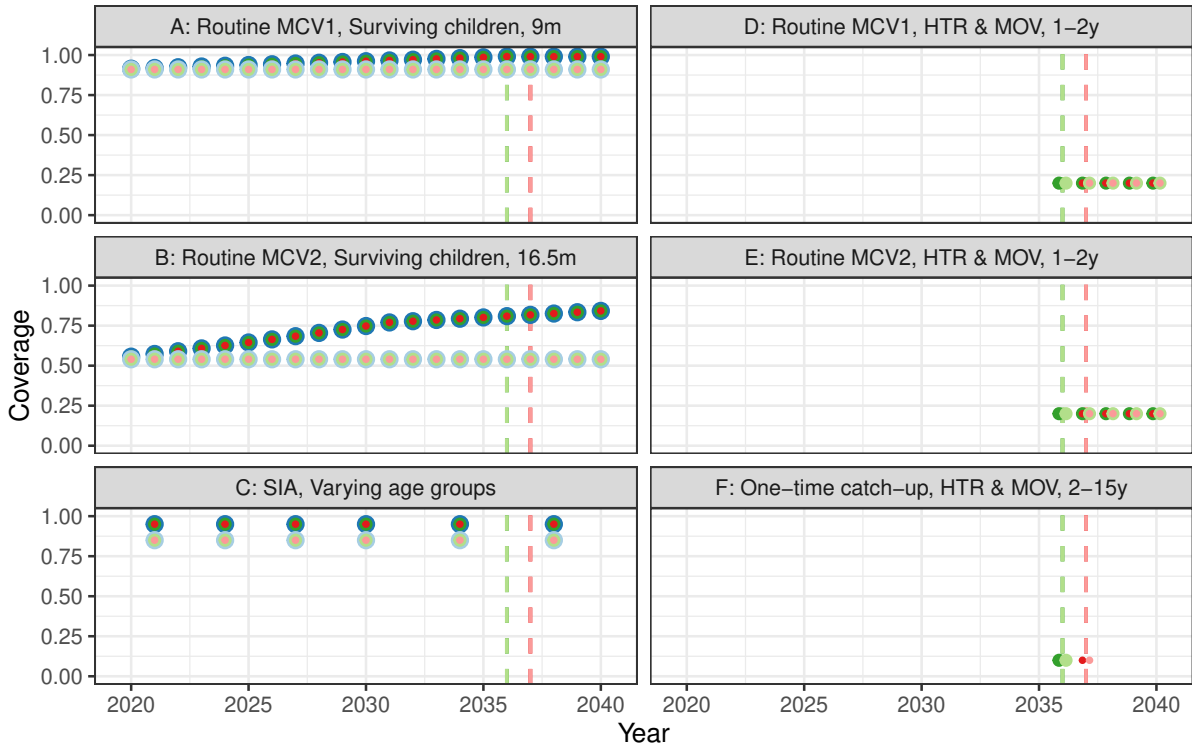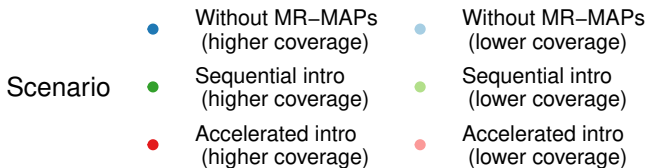

# Burkina Faso

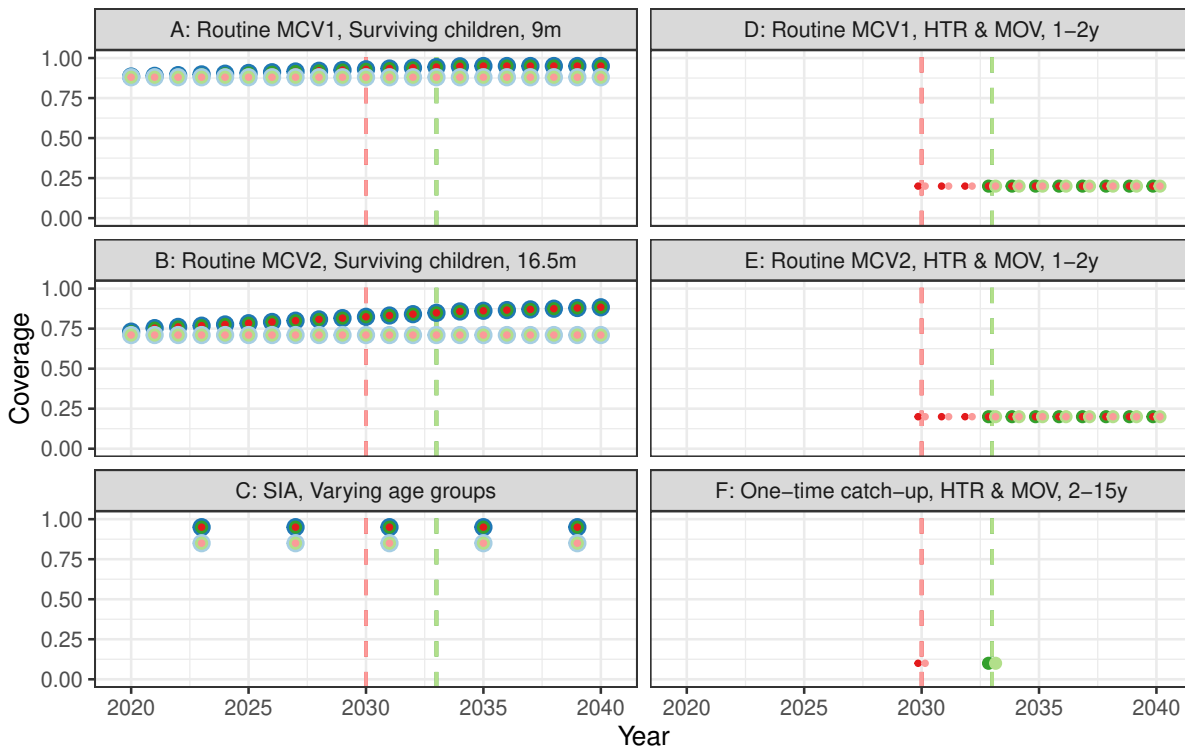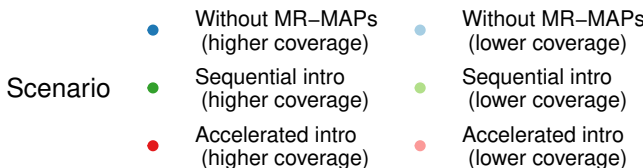



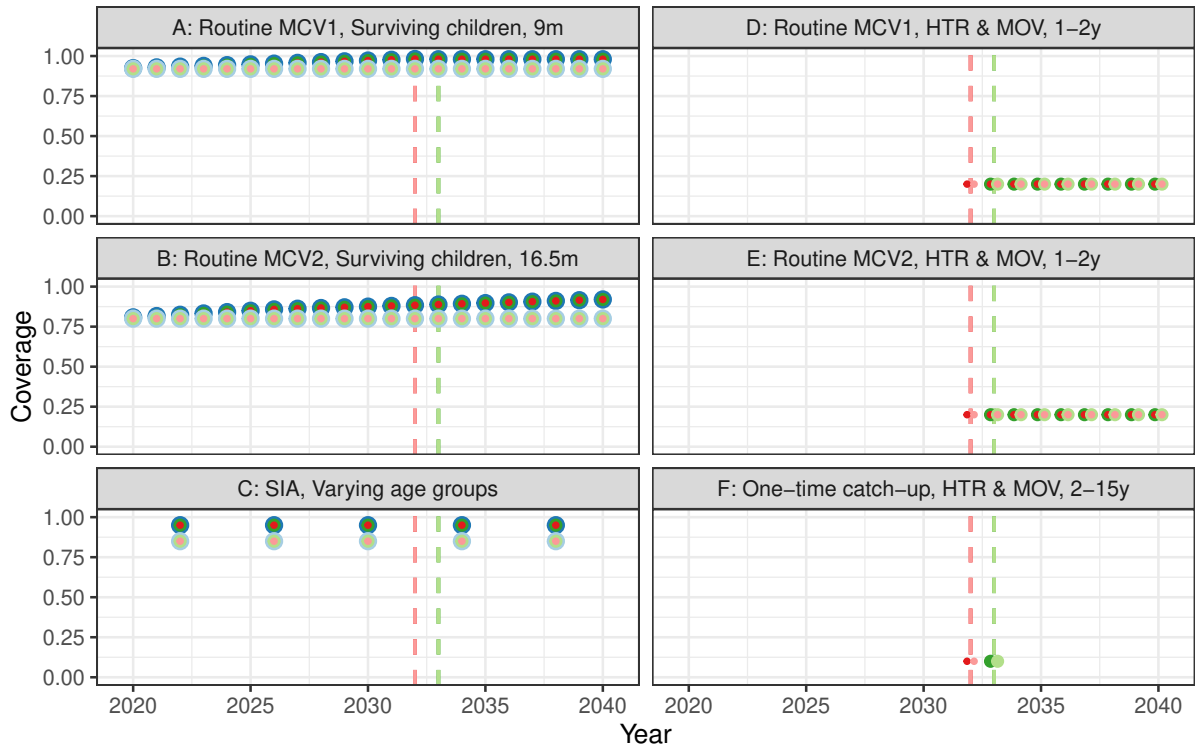

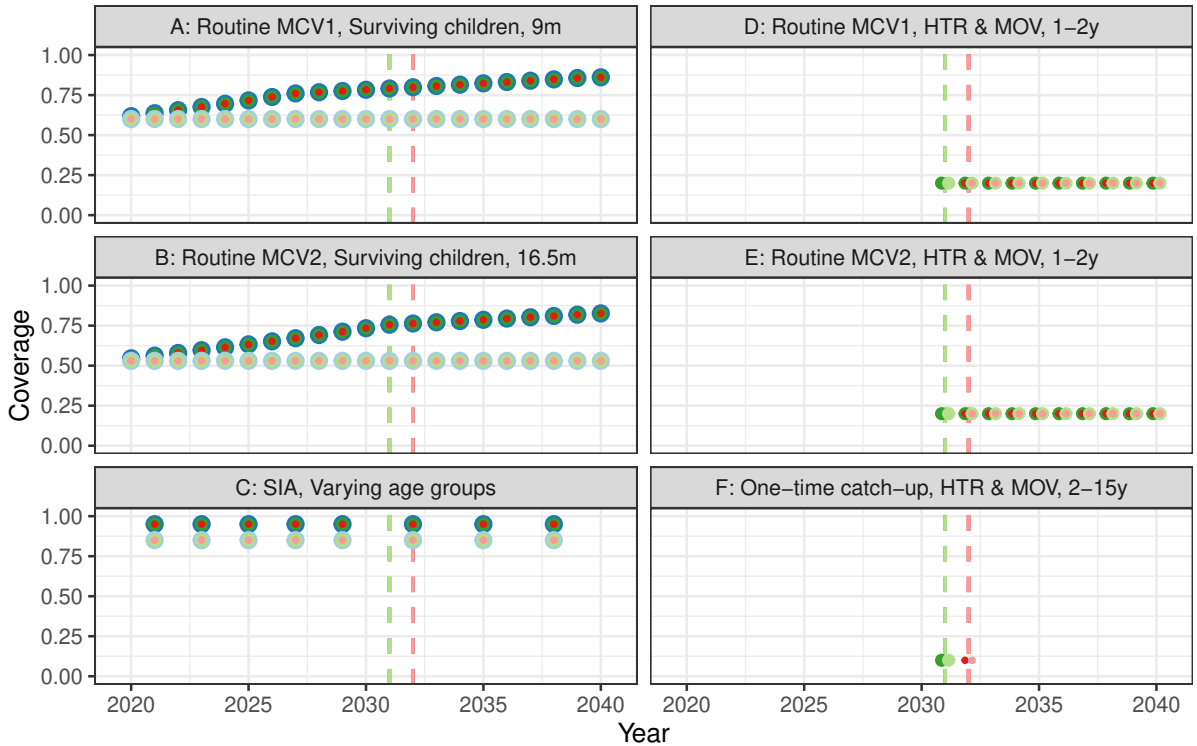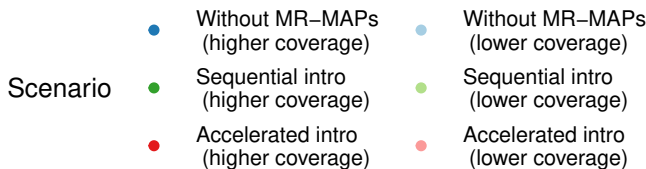

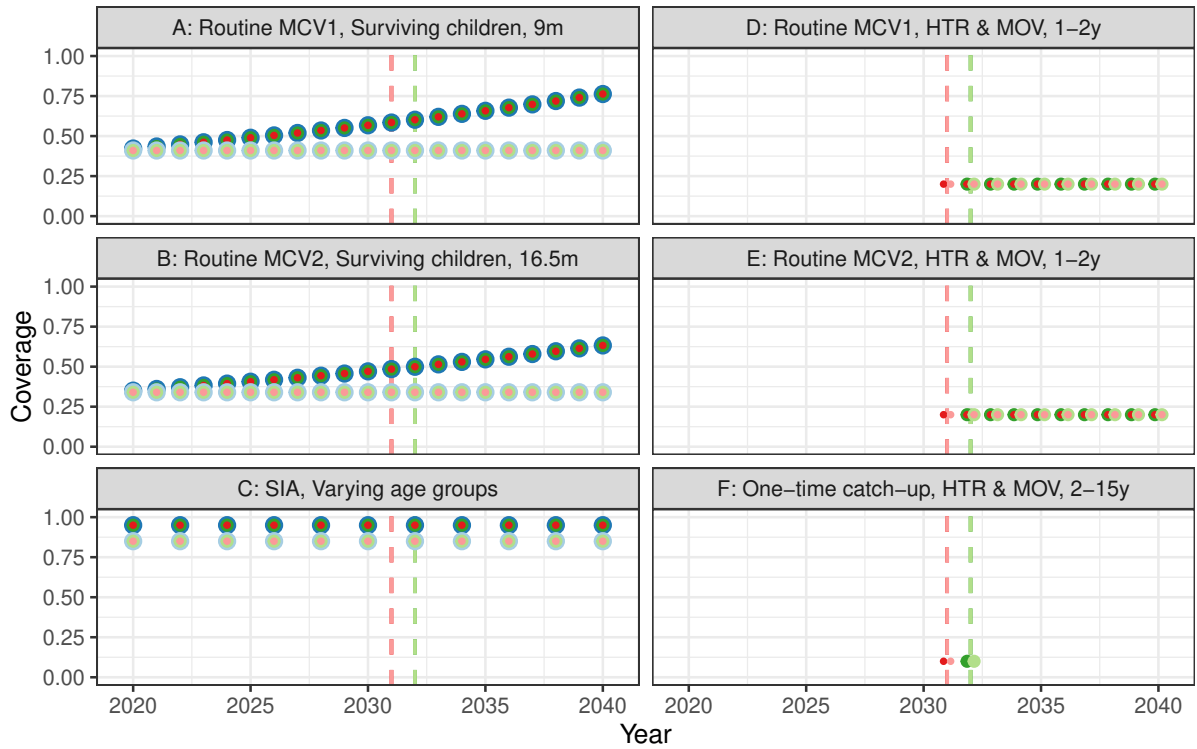

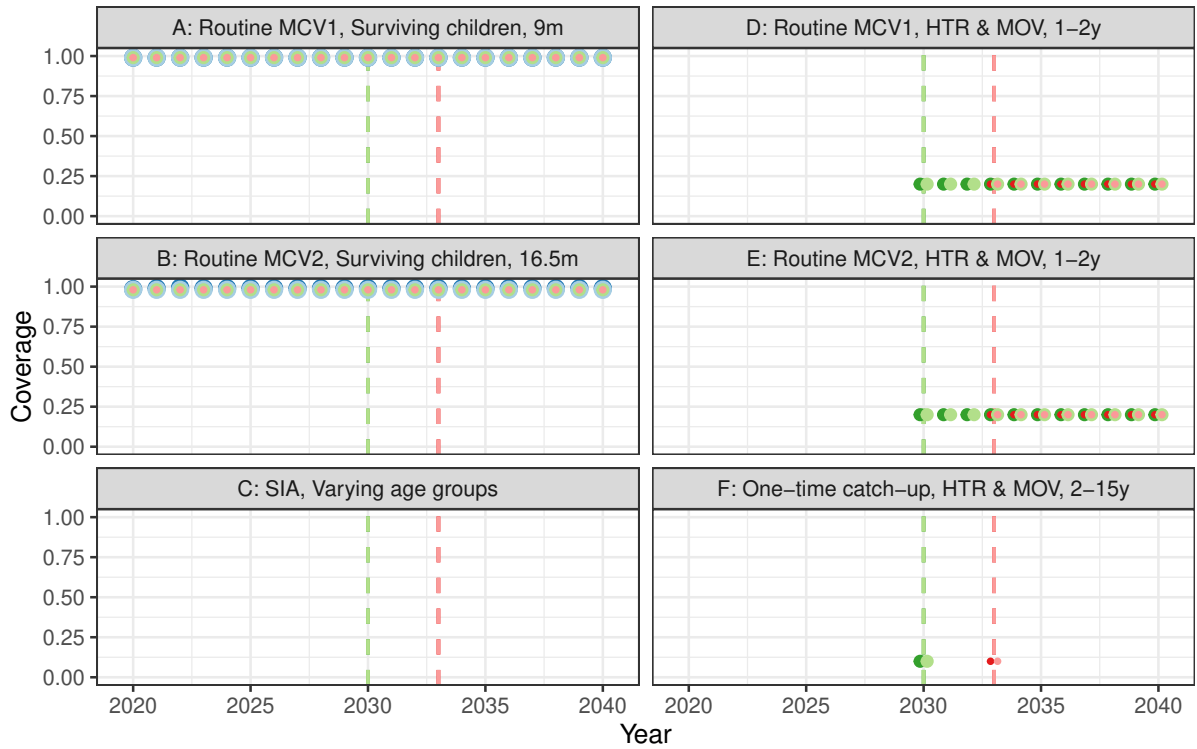

# Comoros

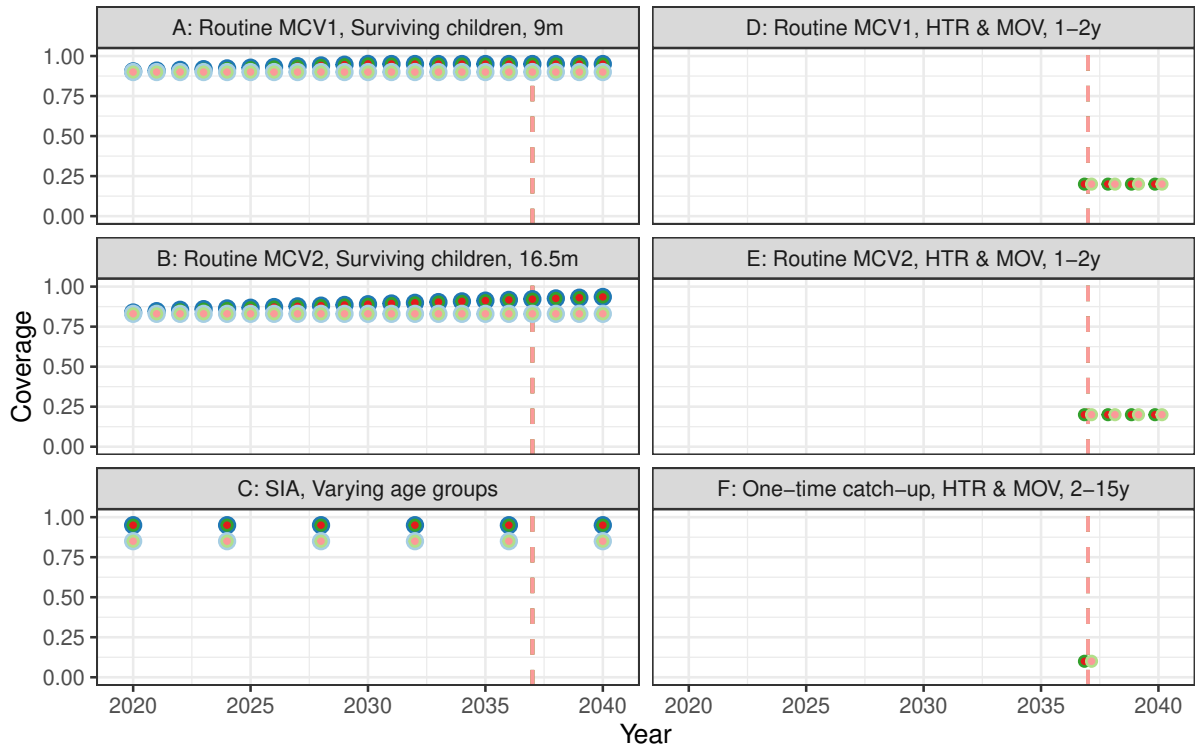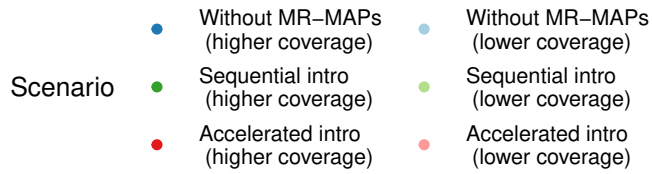

# Democratic Republic of the Congo

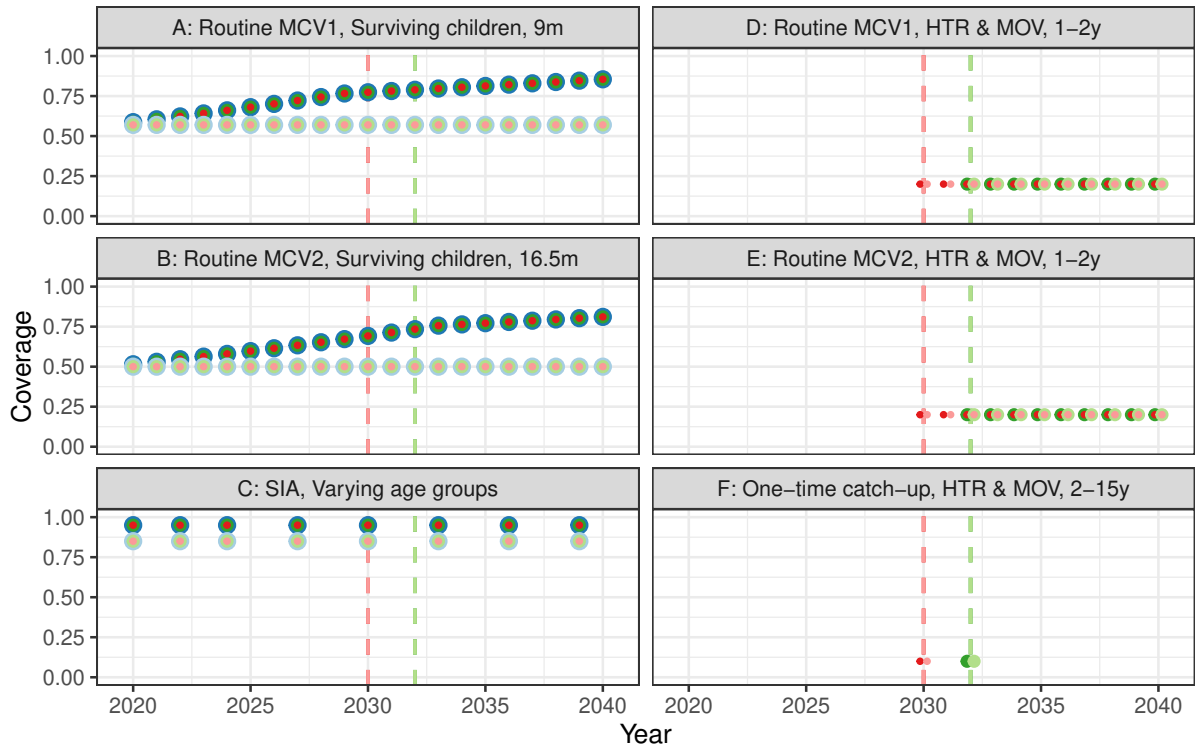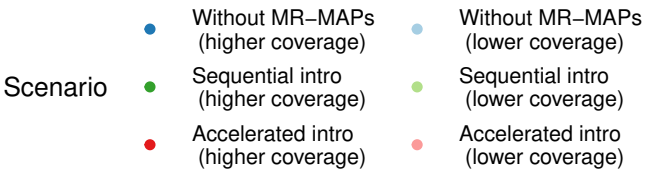

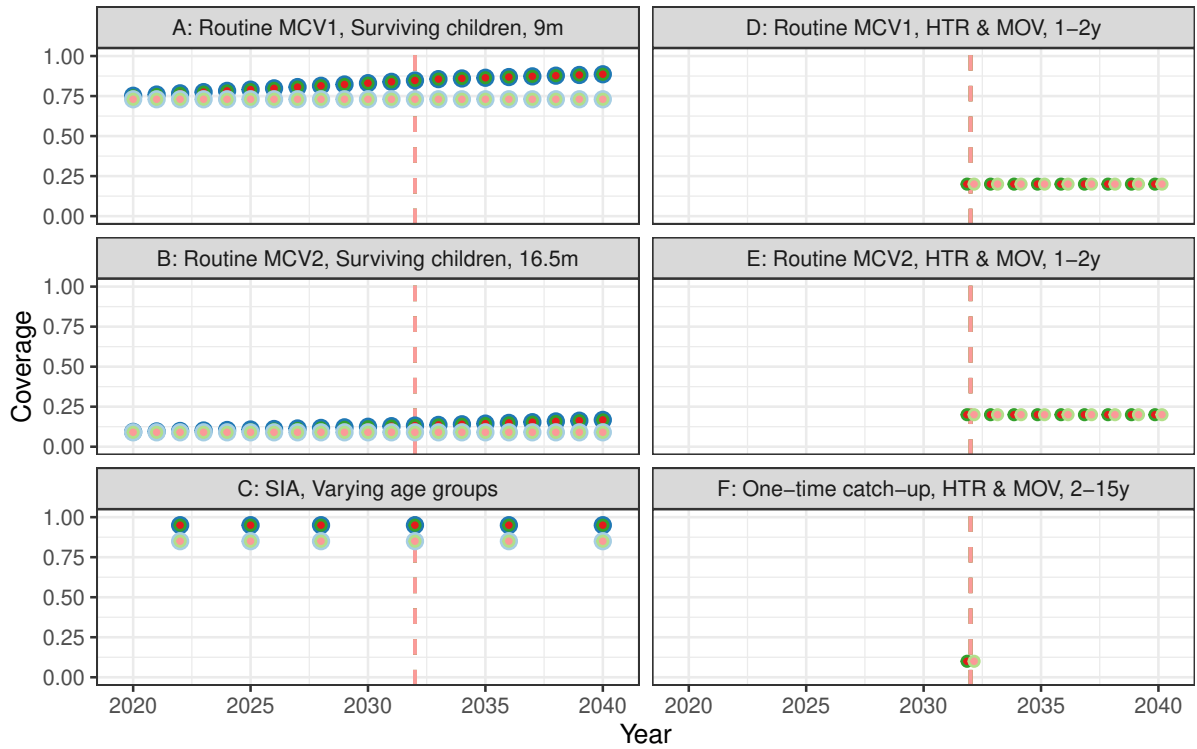

# Côte d'Ivoire

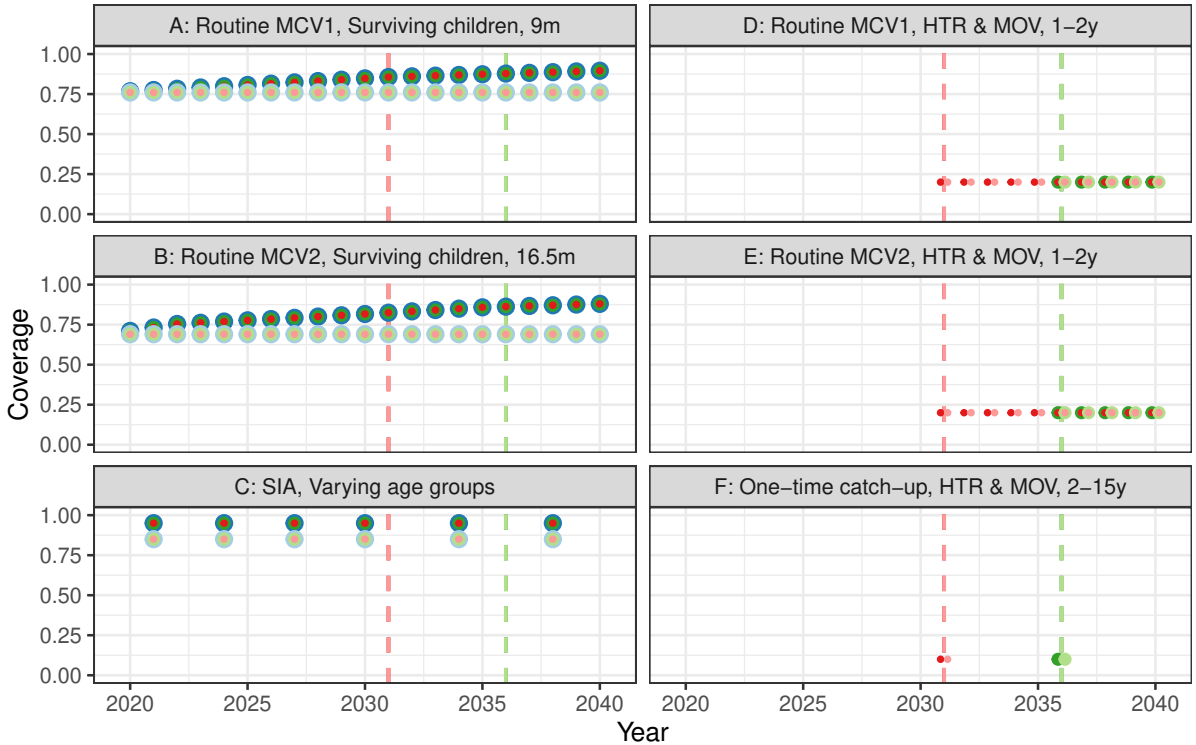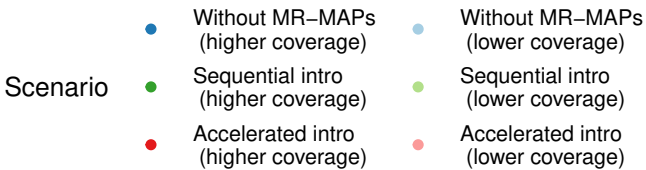



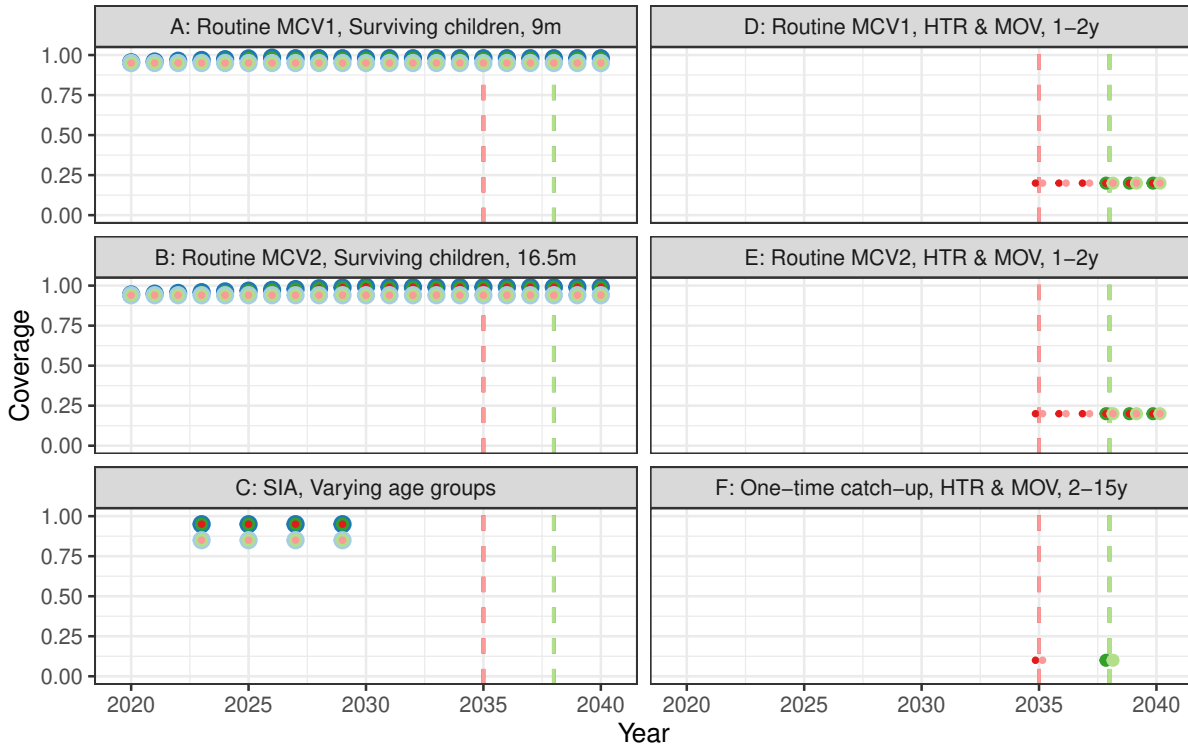

# Equatorial Guinea

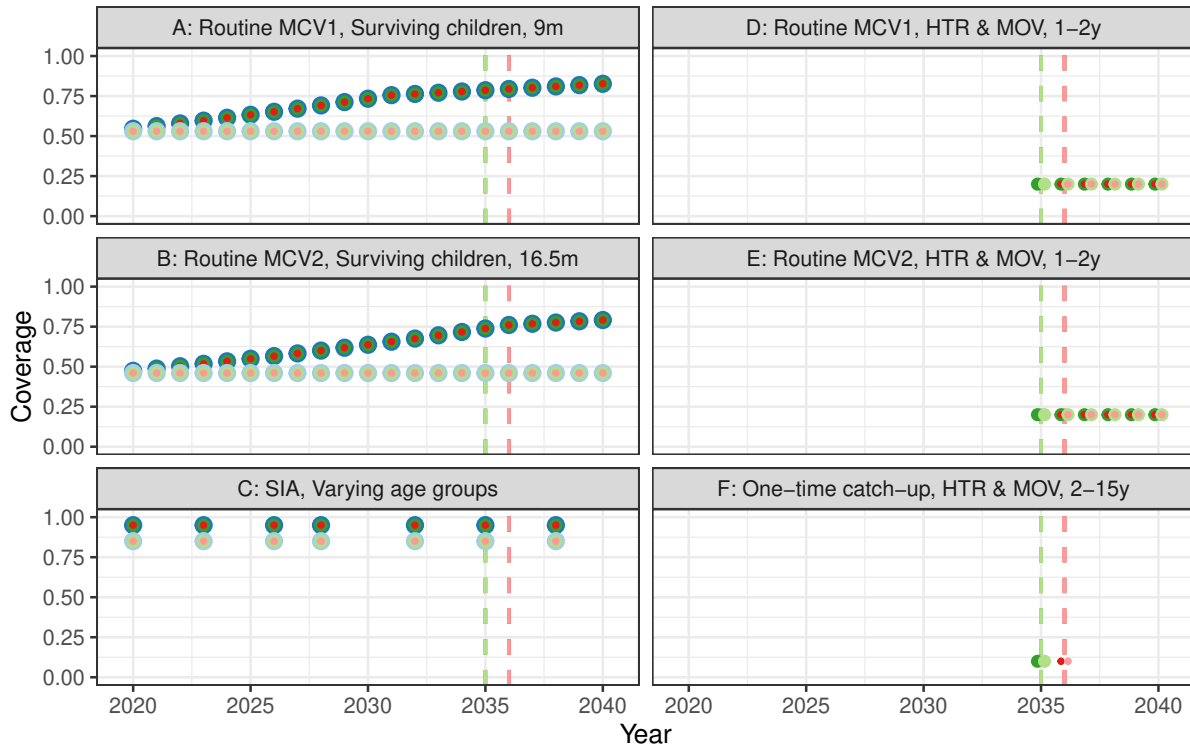

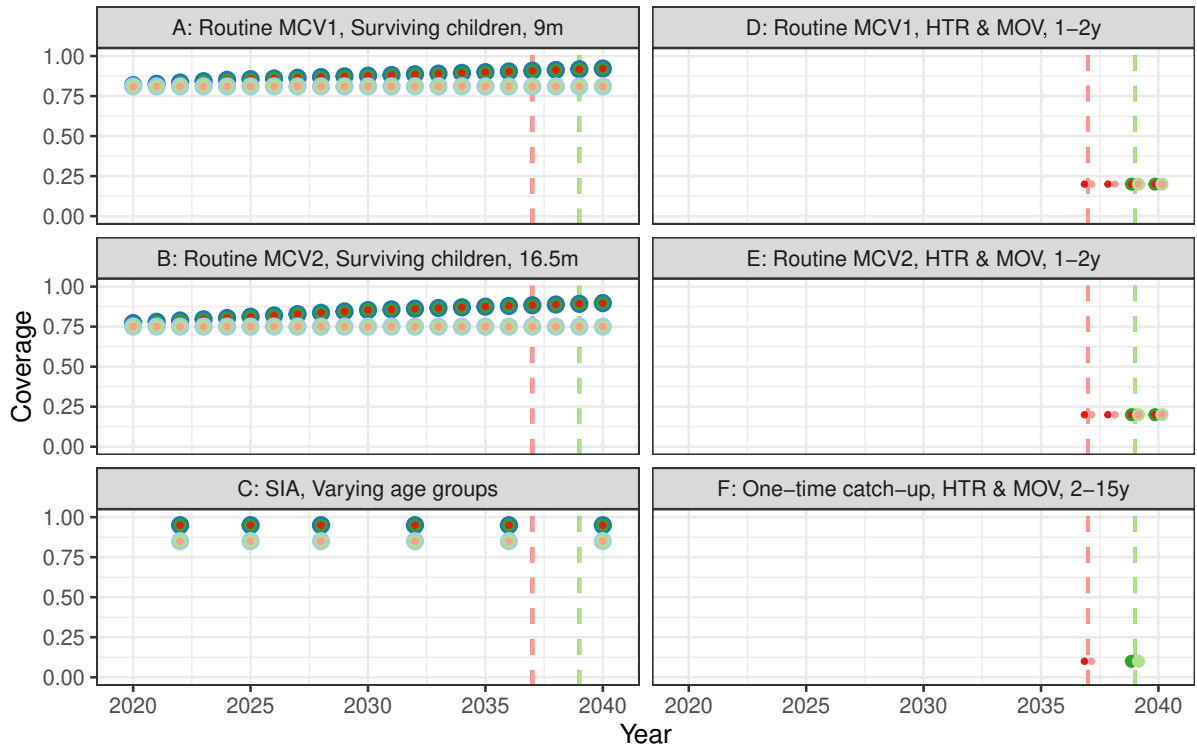

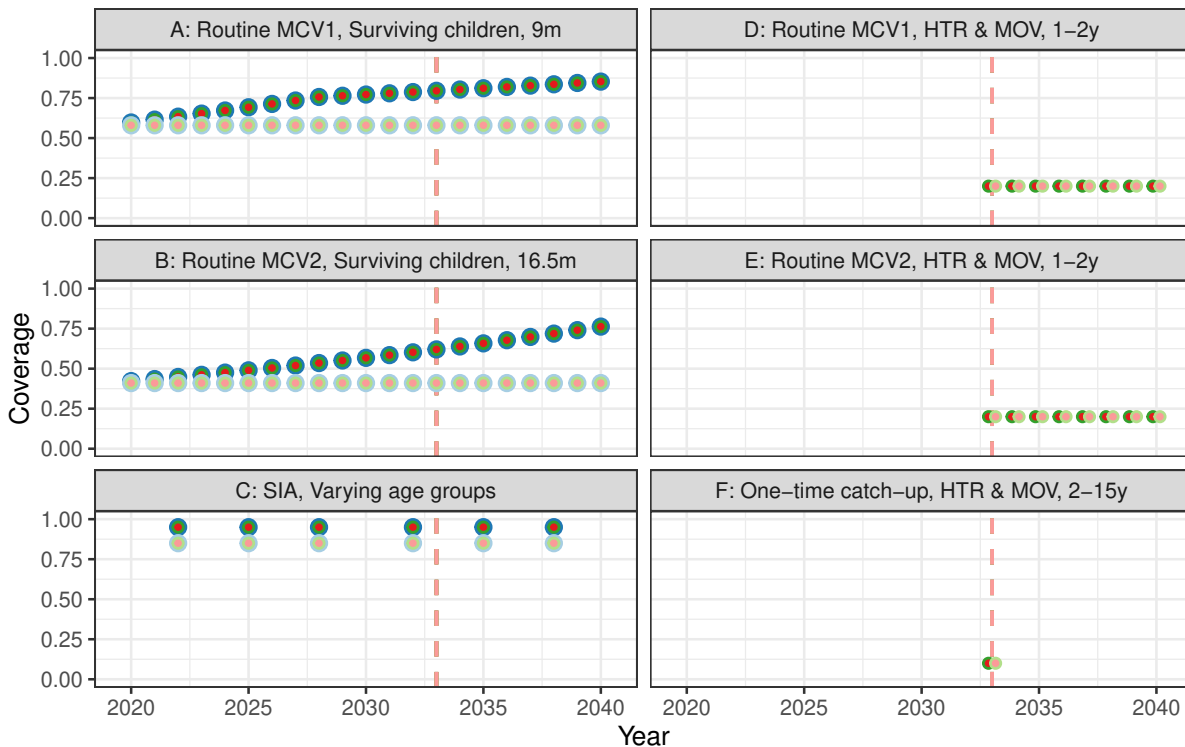

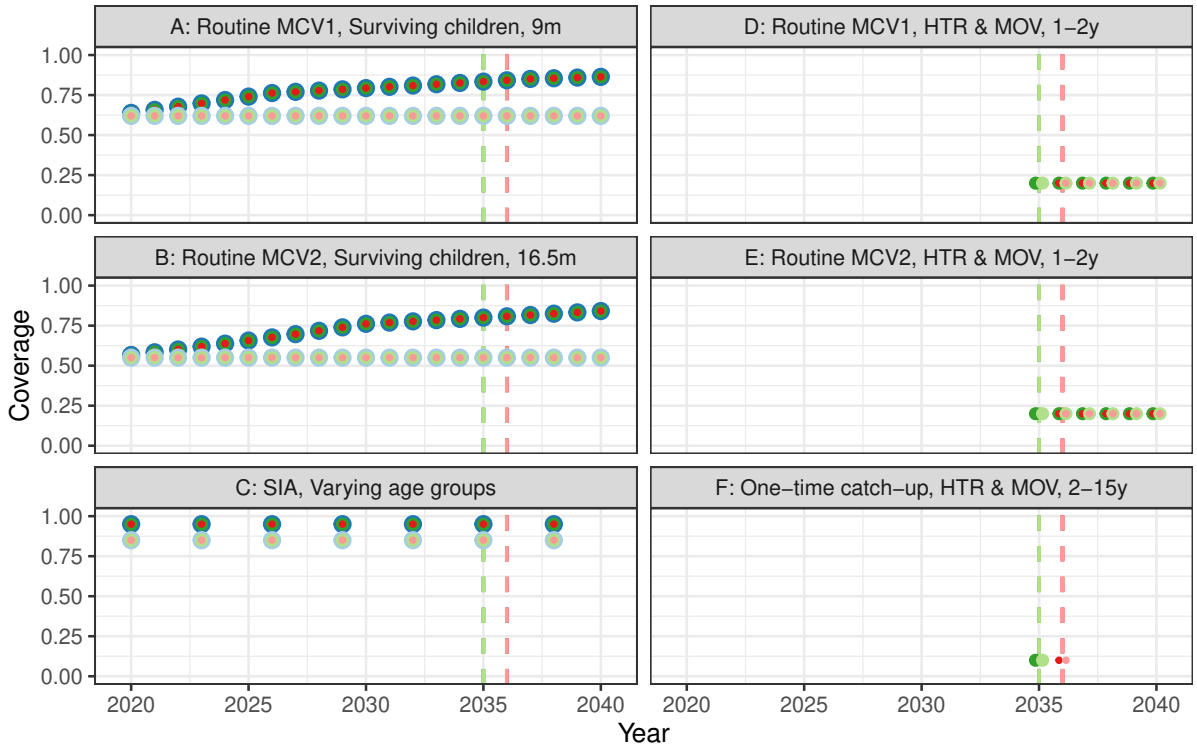

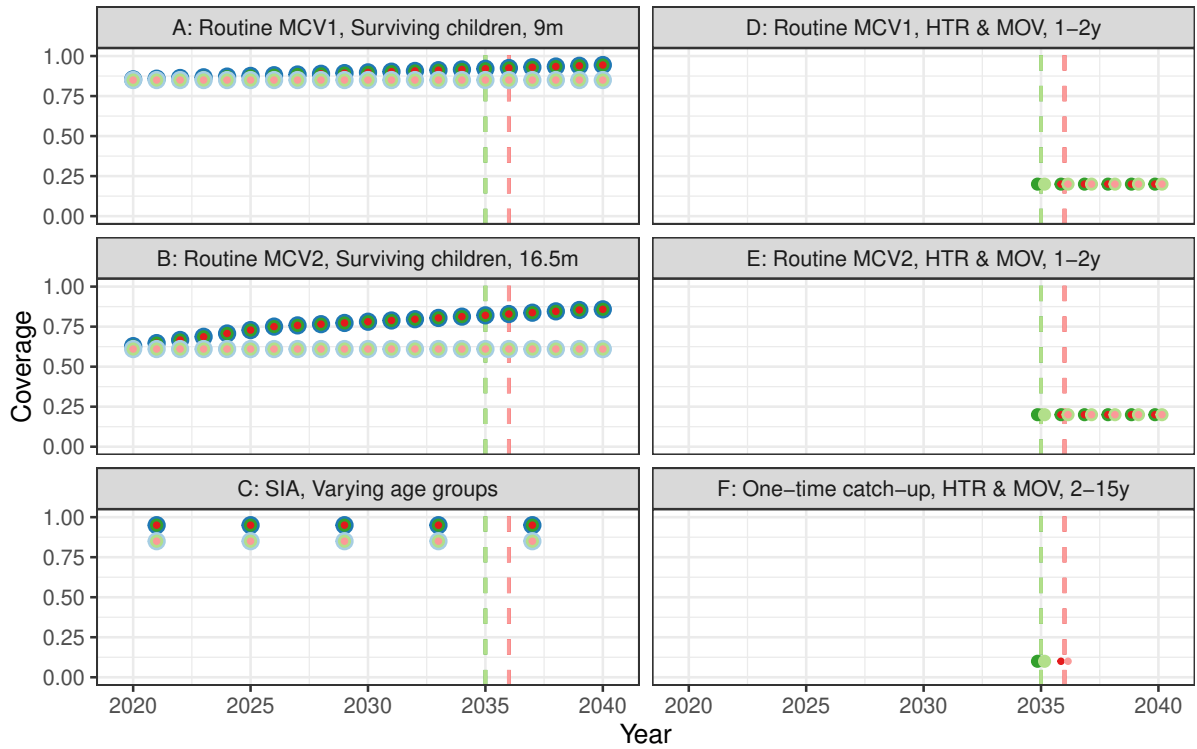

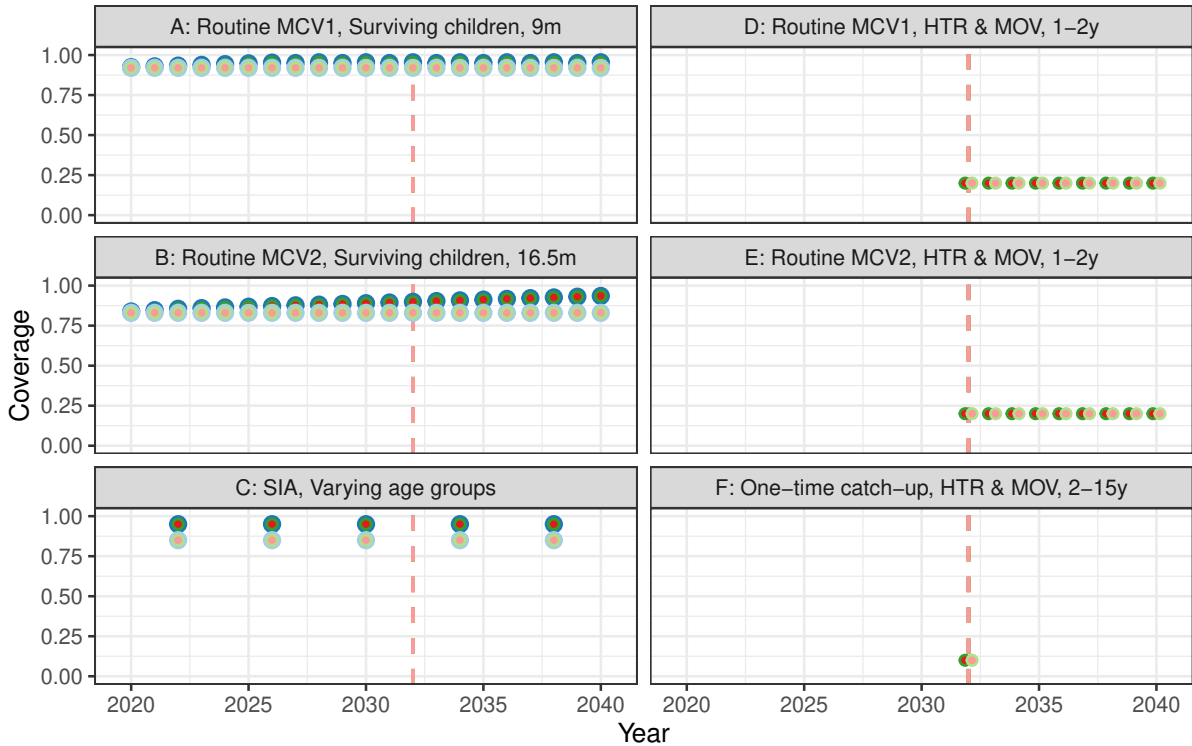

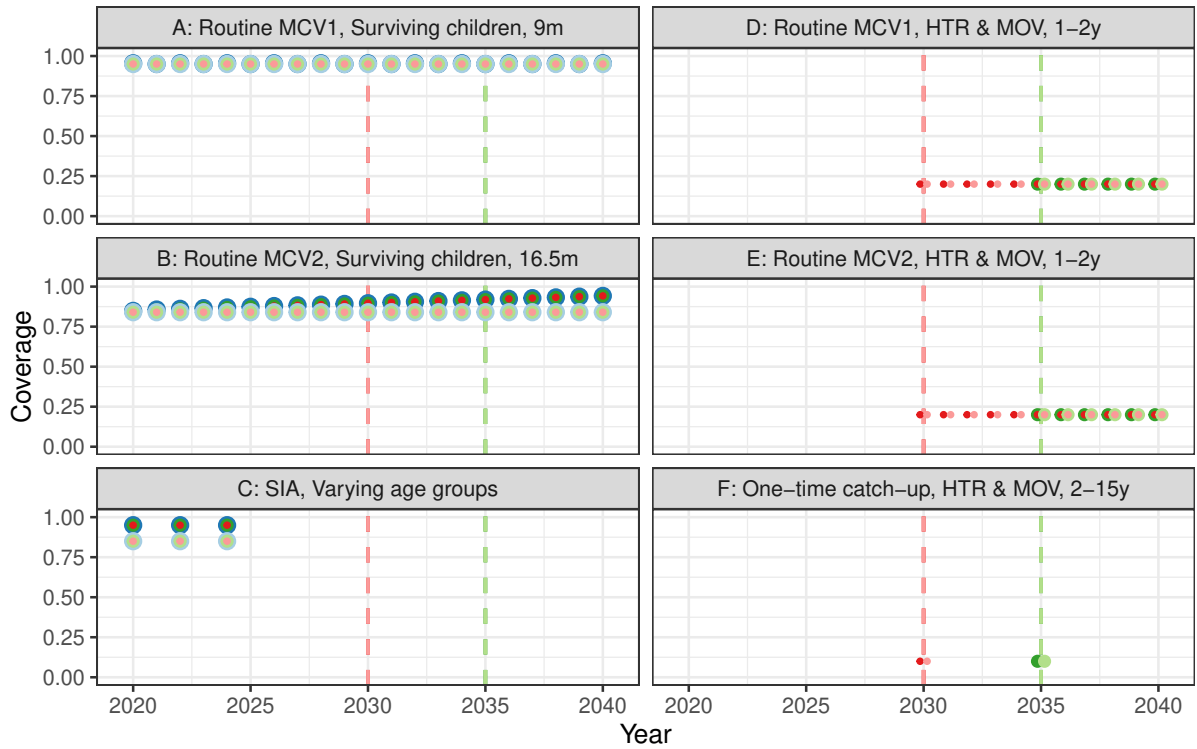



# Indonesia

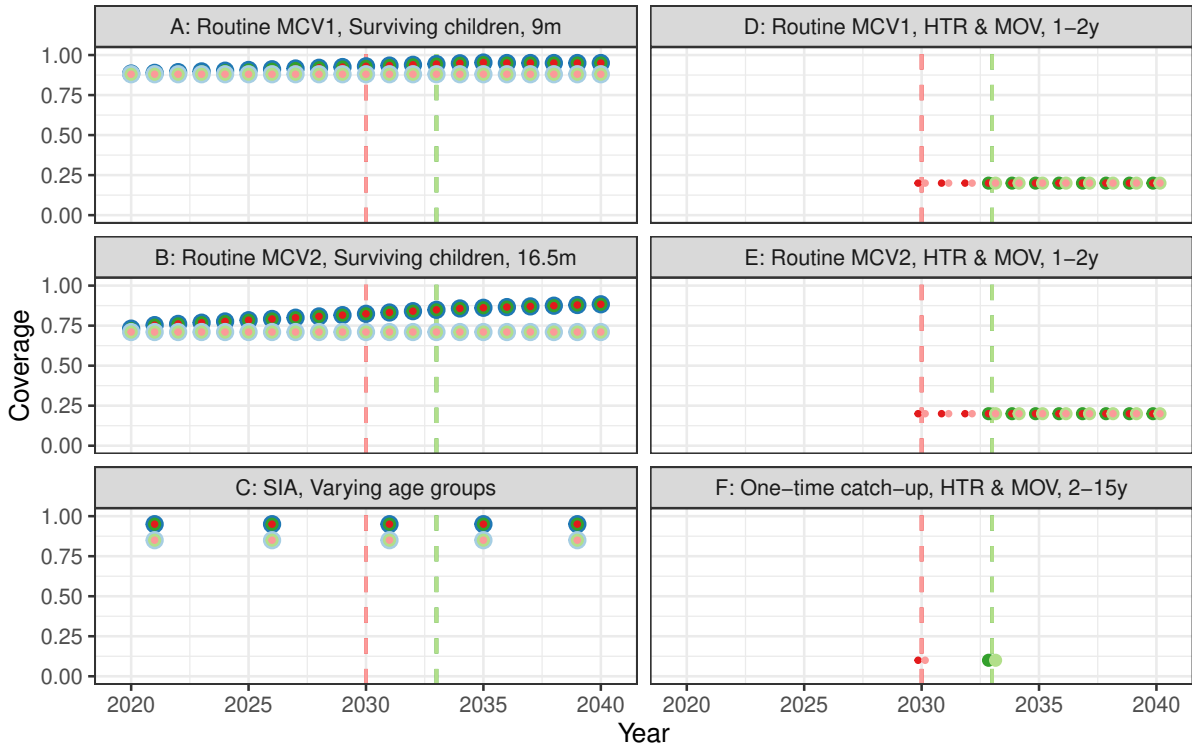

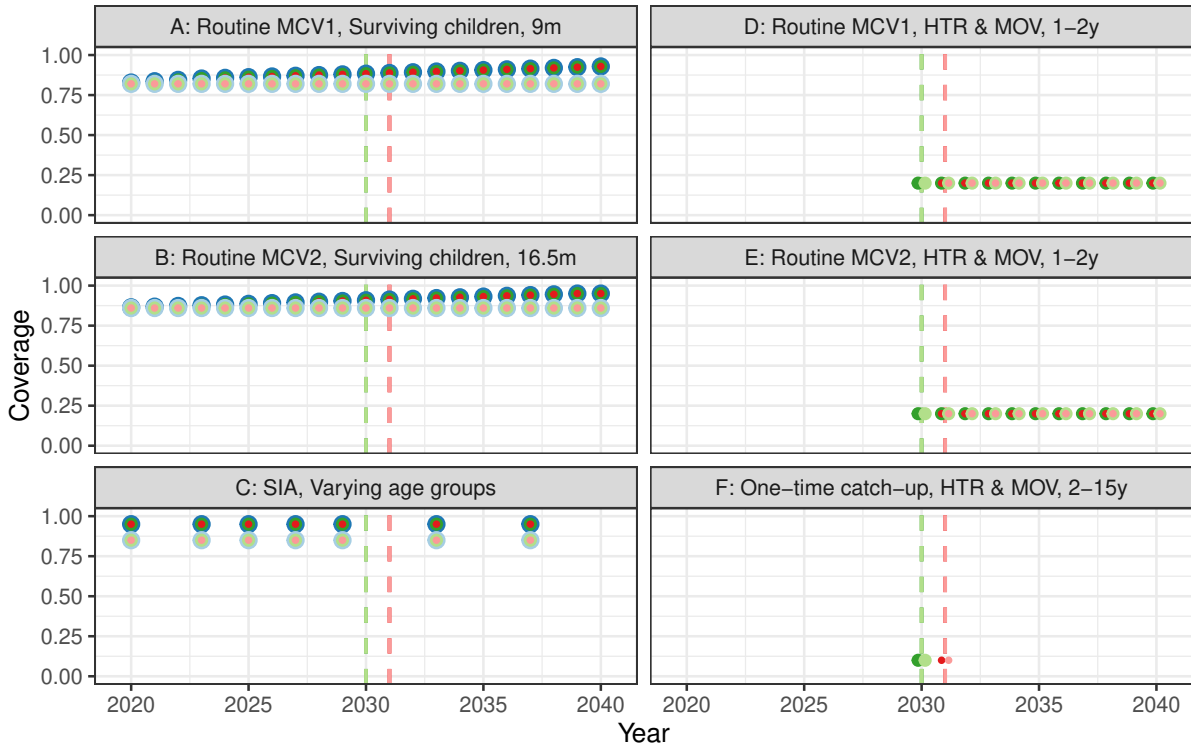

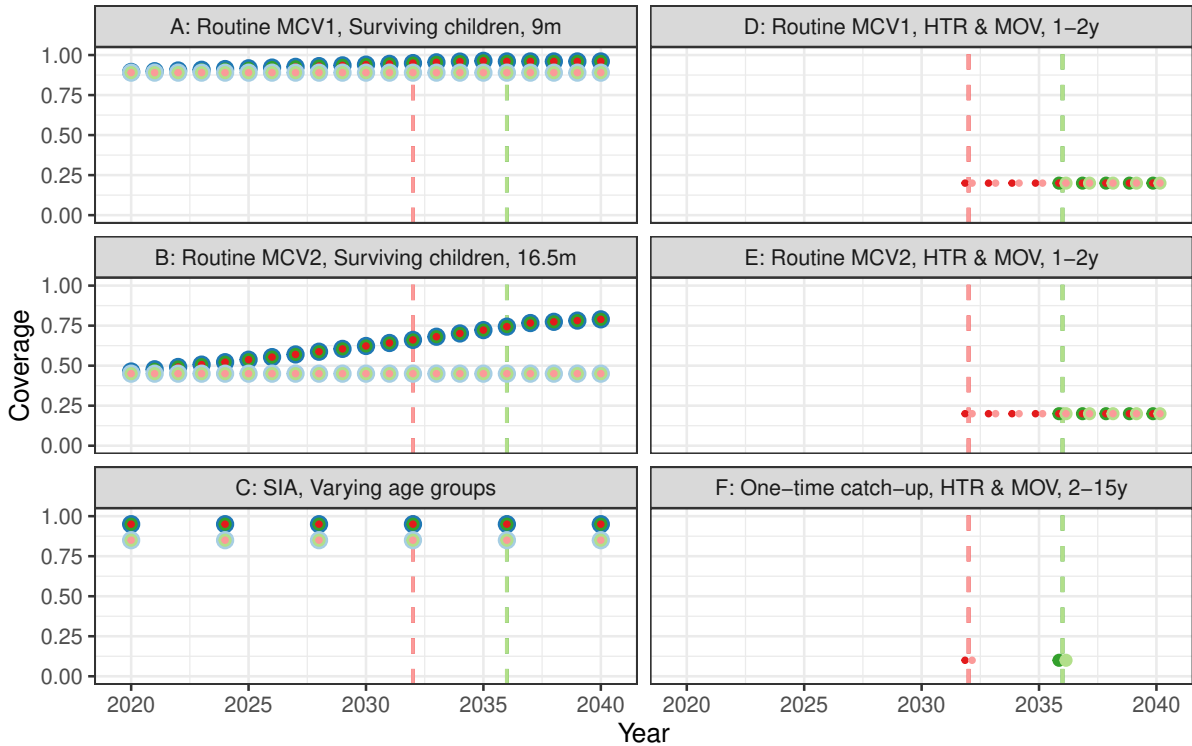

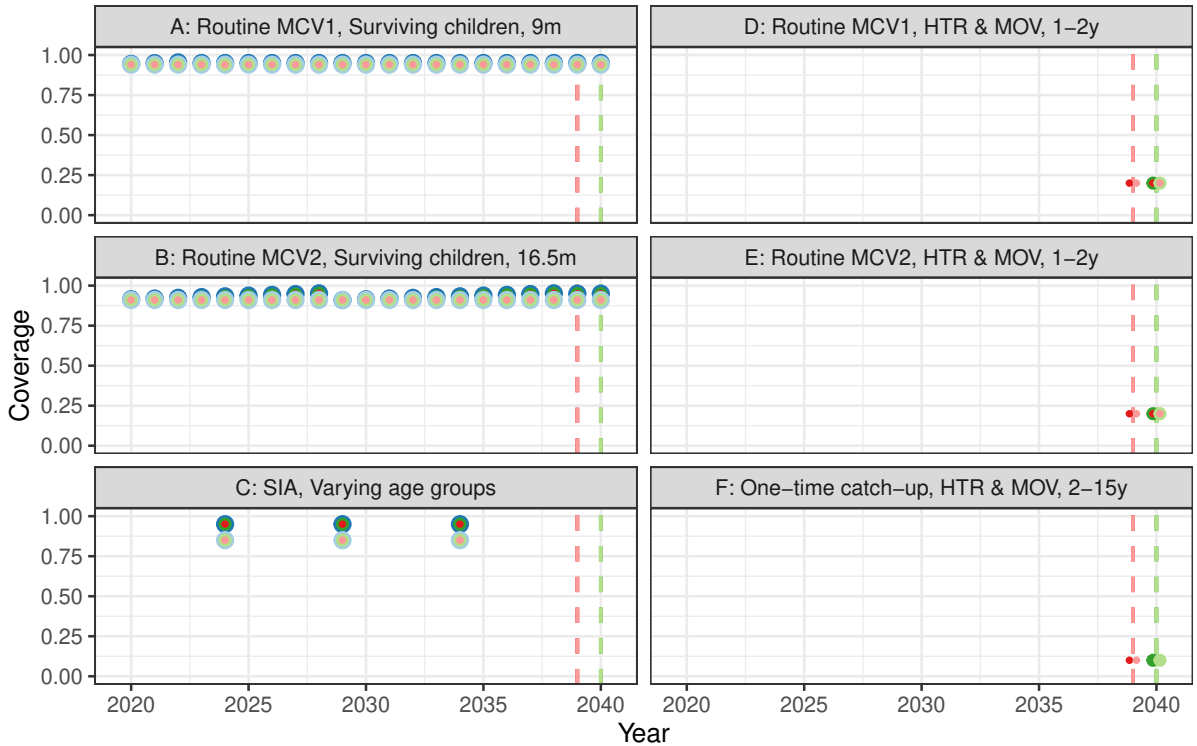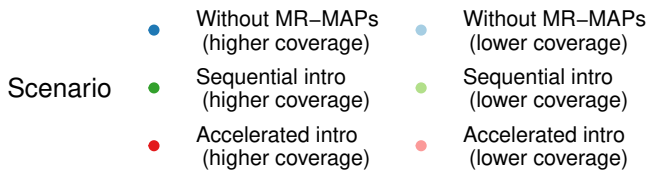

# Lao People's Democratic Republic

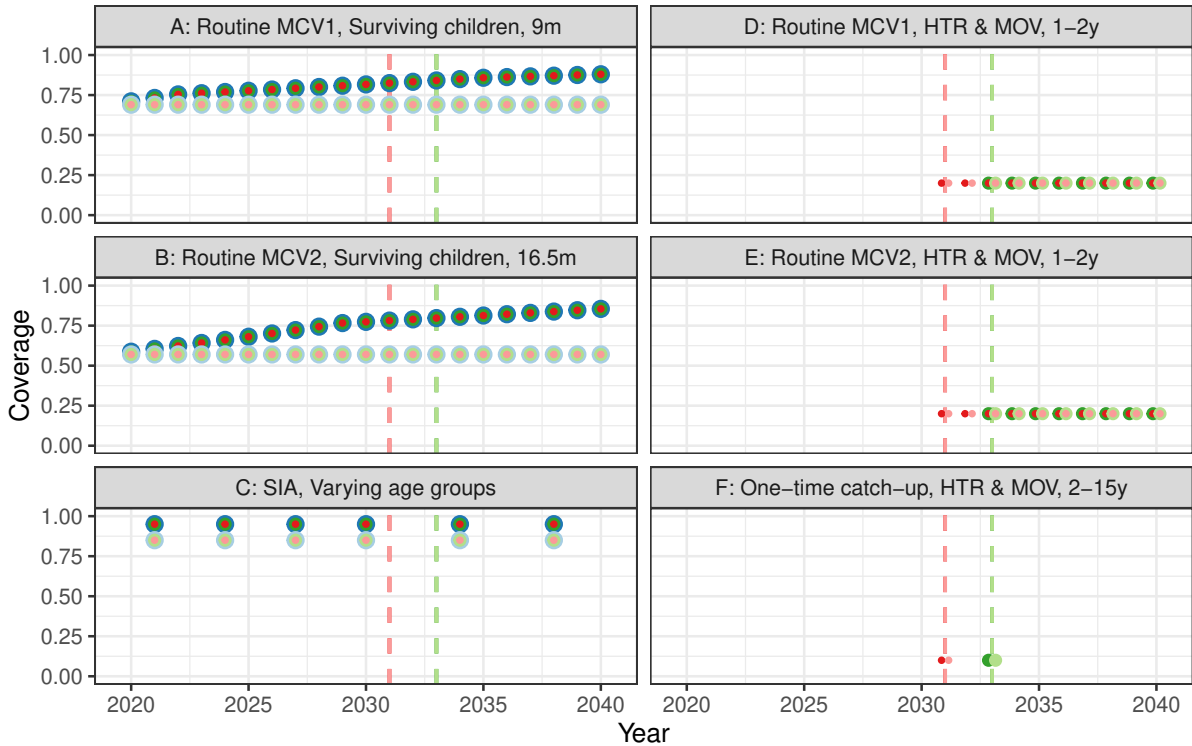

# Lebanon

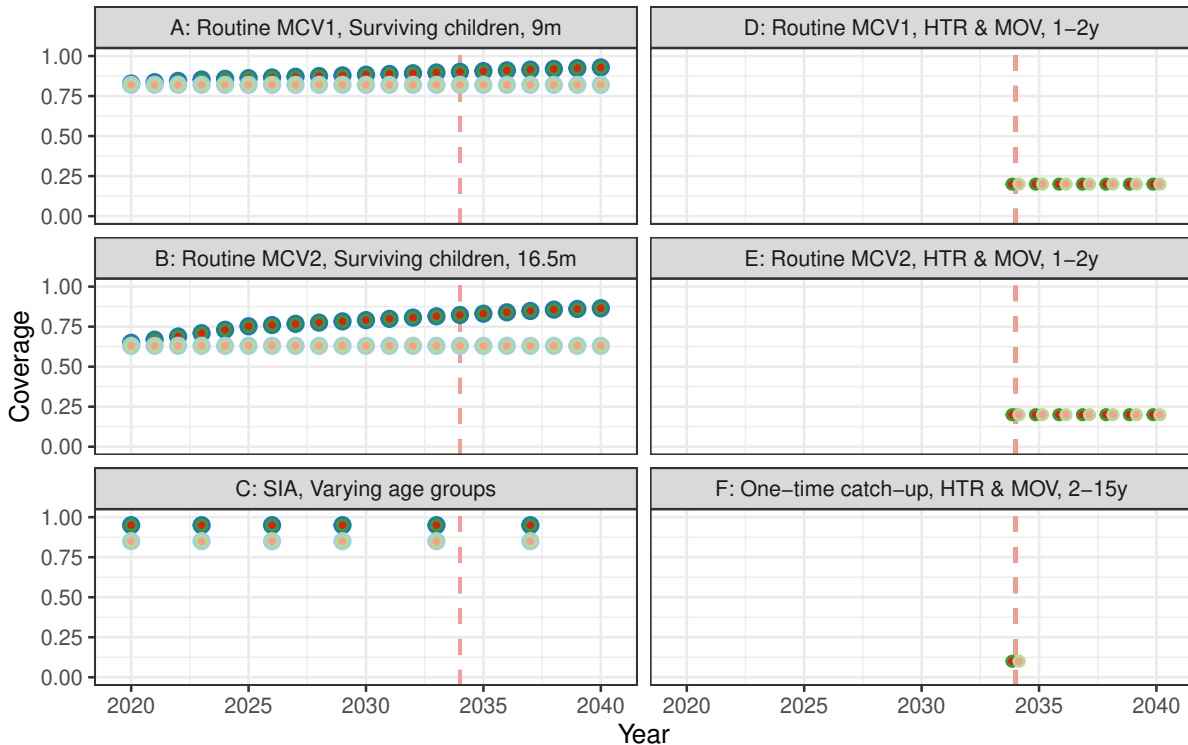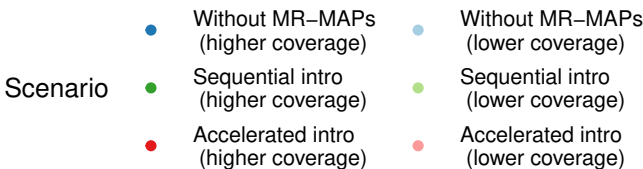

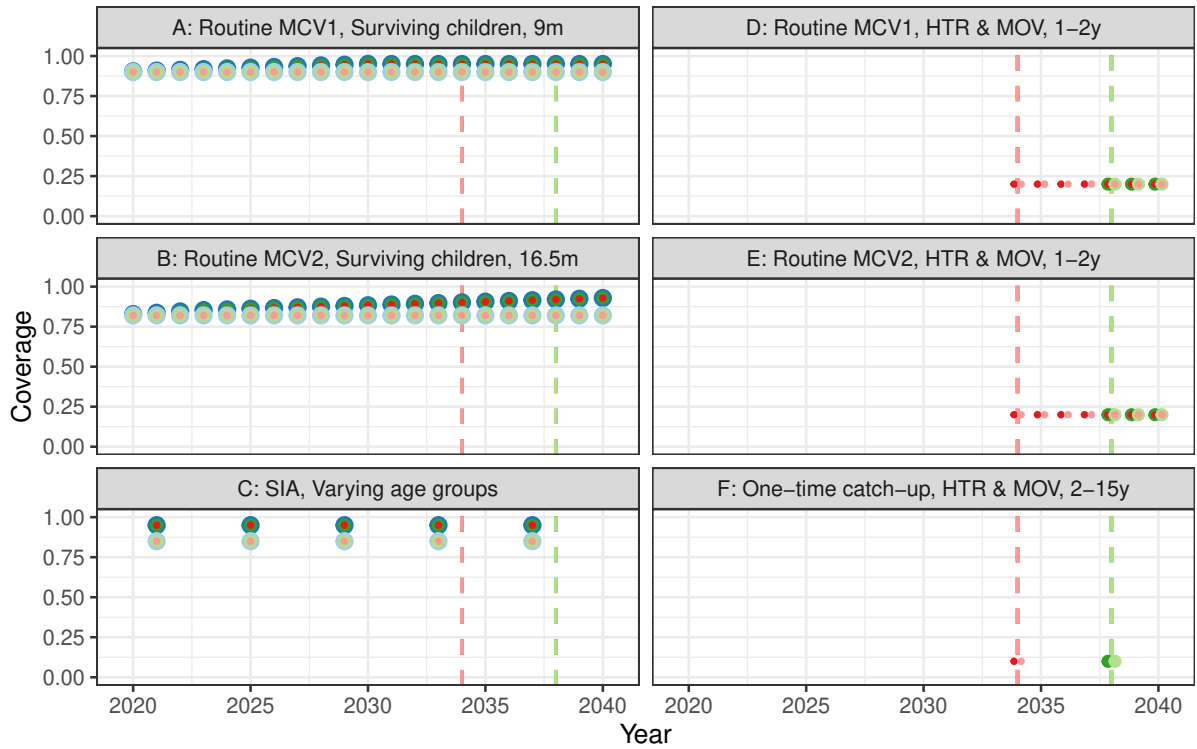

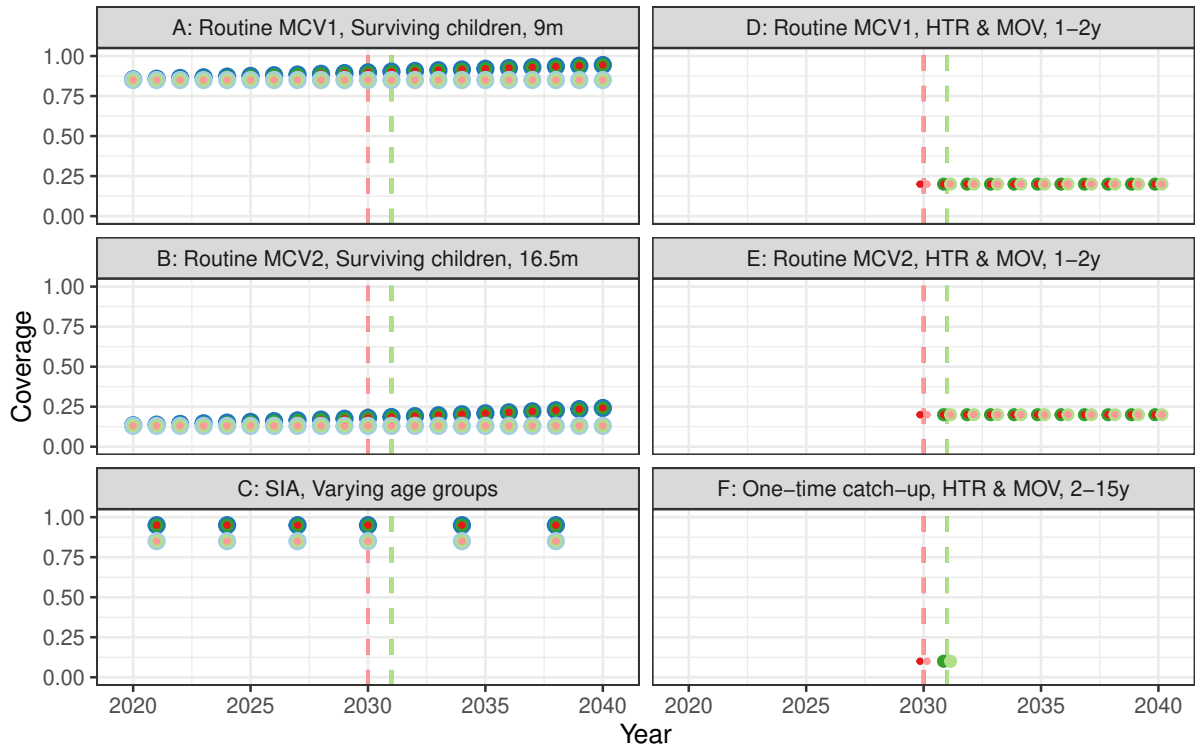



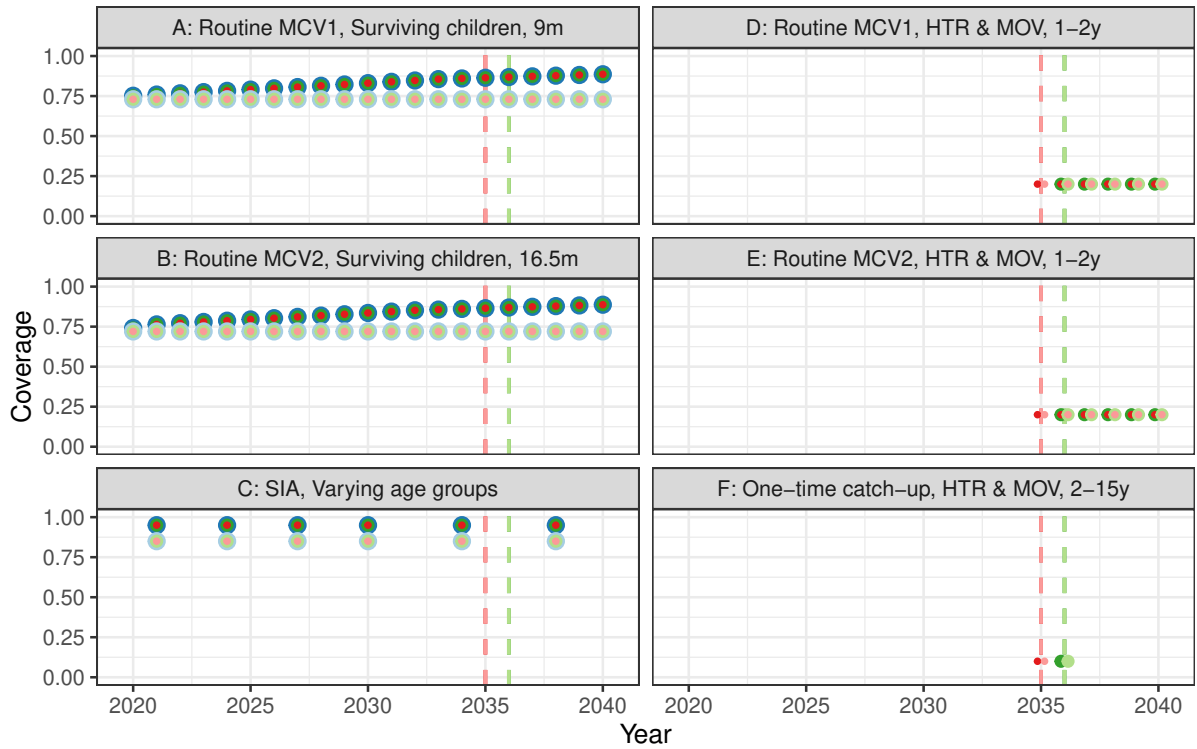

# Madagascar

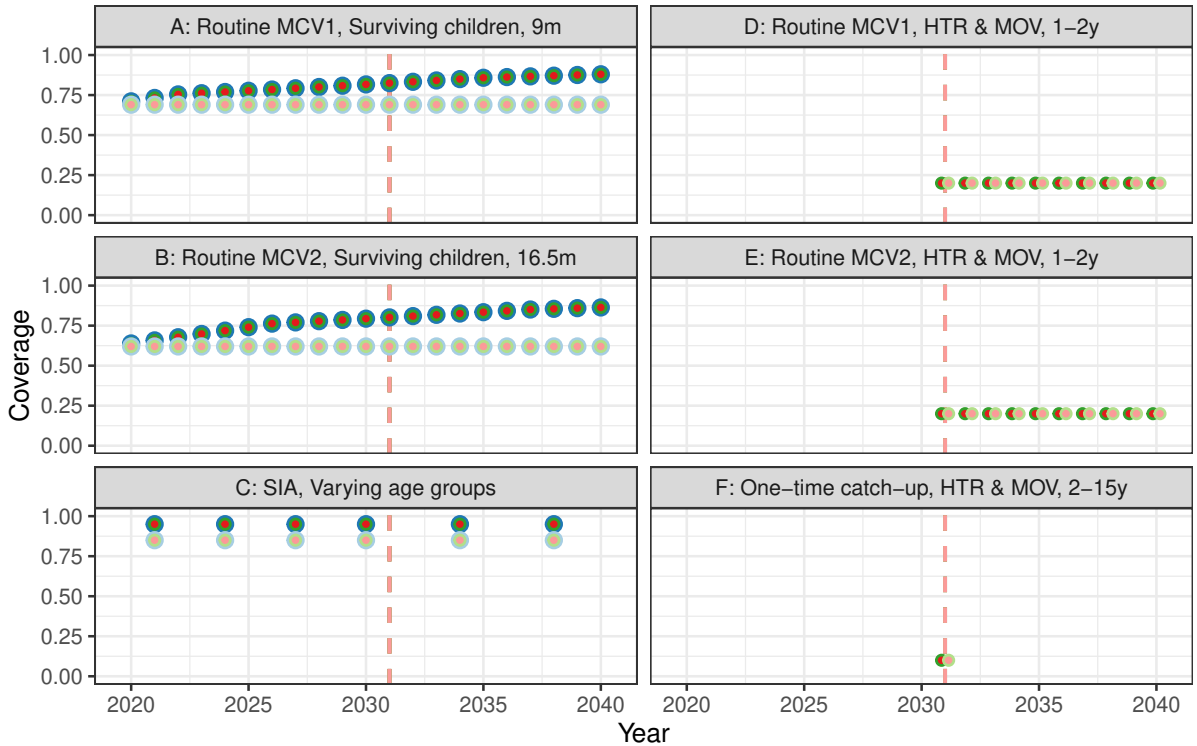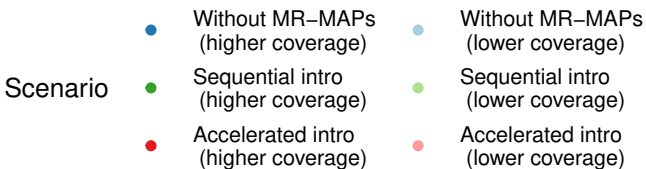

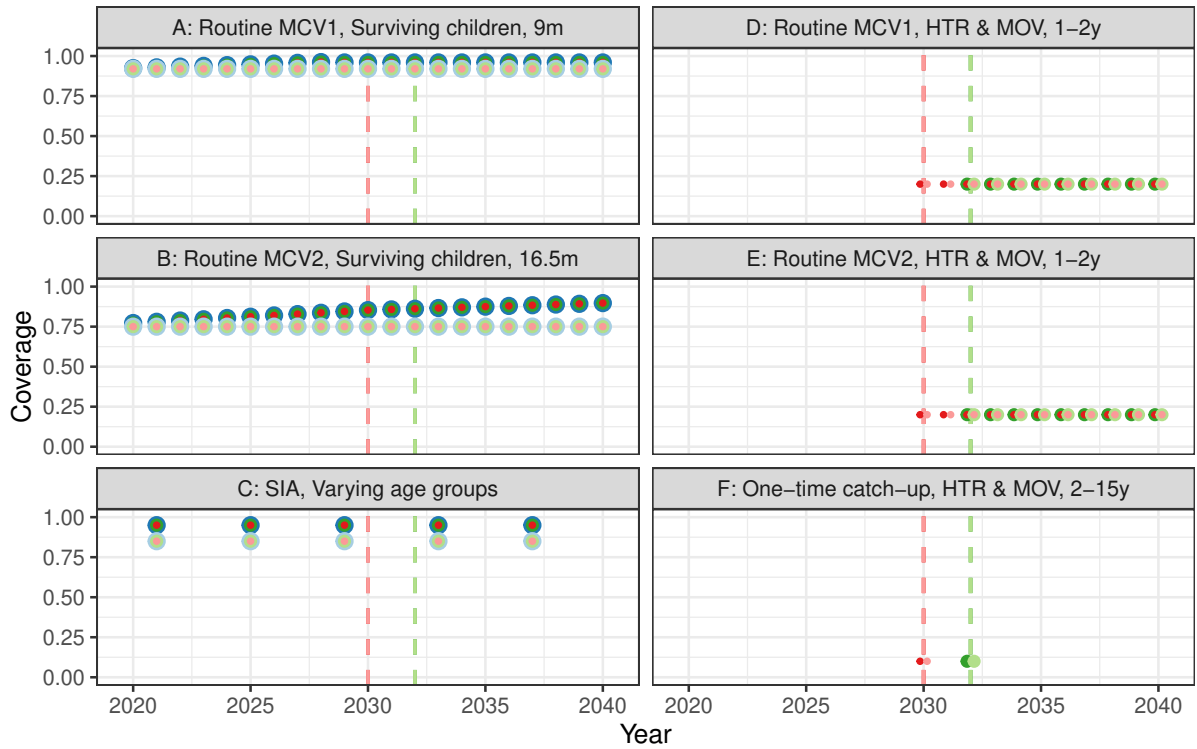

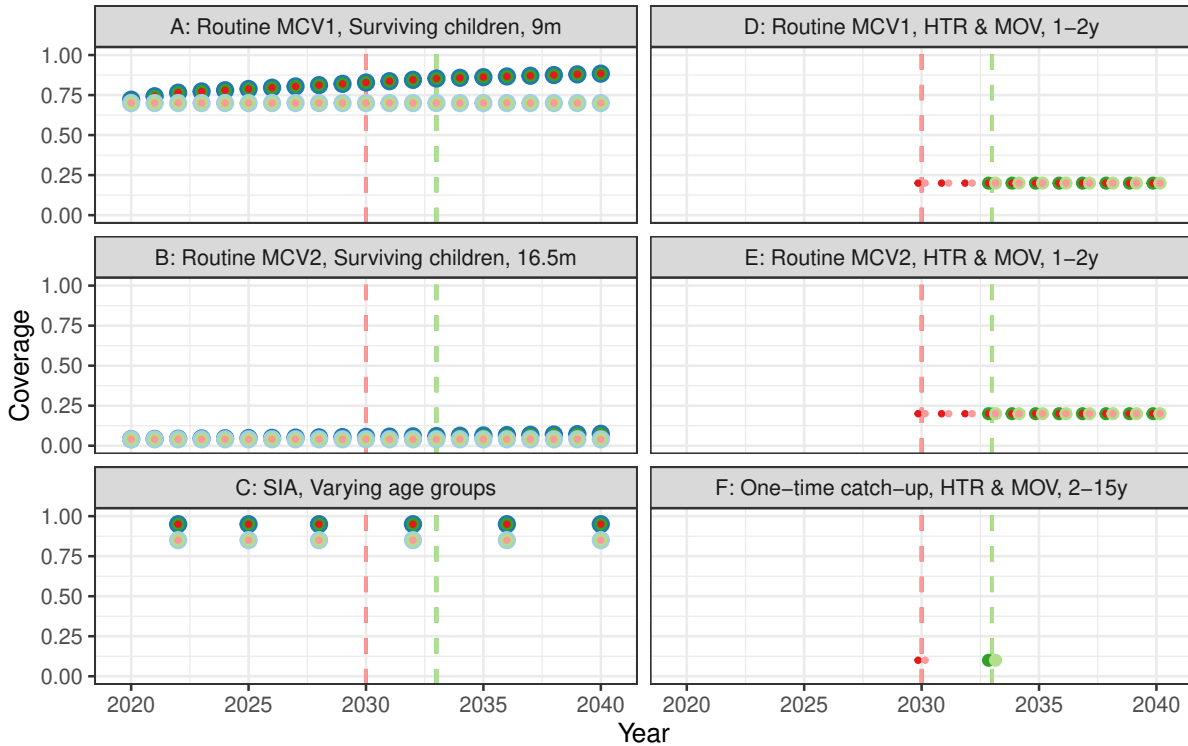

# Mauritania

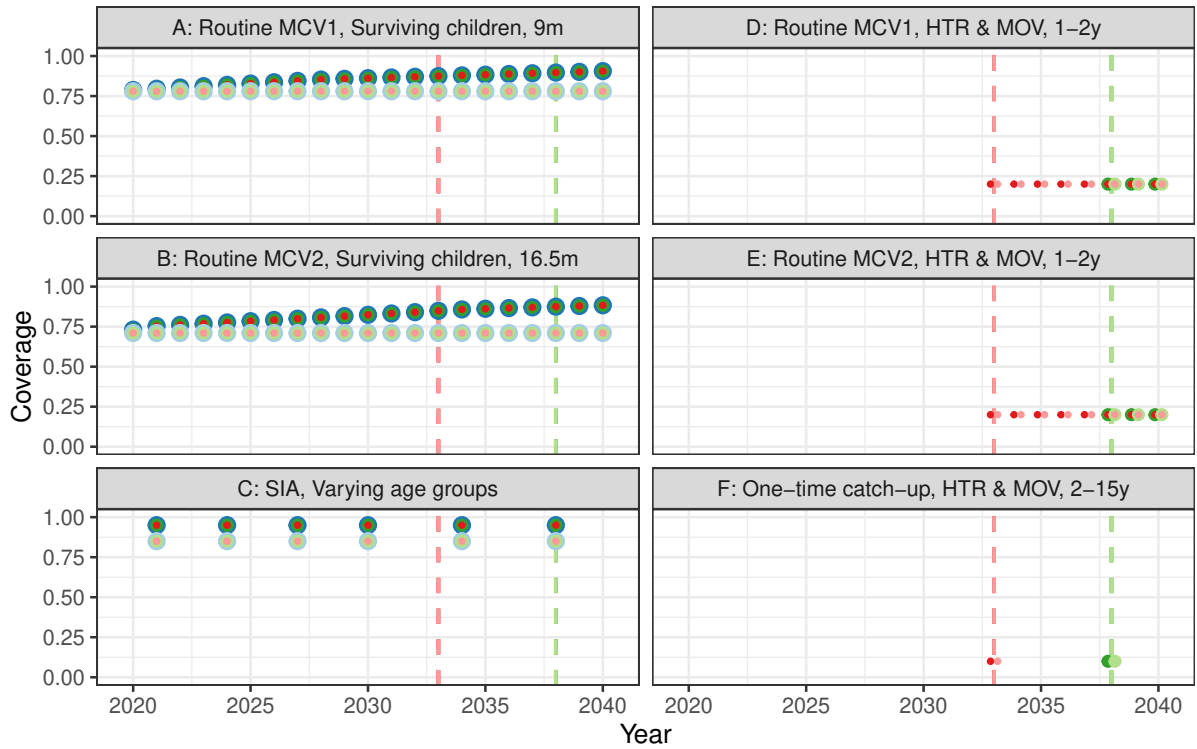

# Federated States of Micronesia

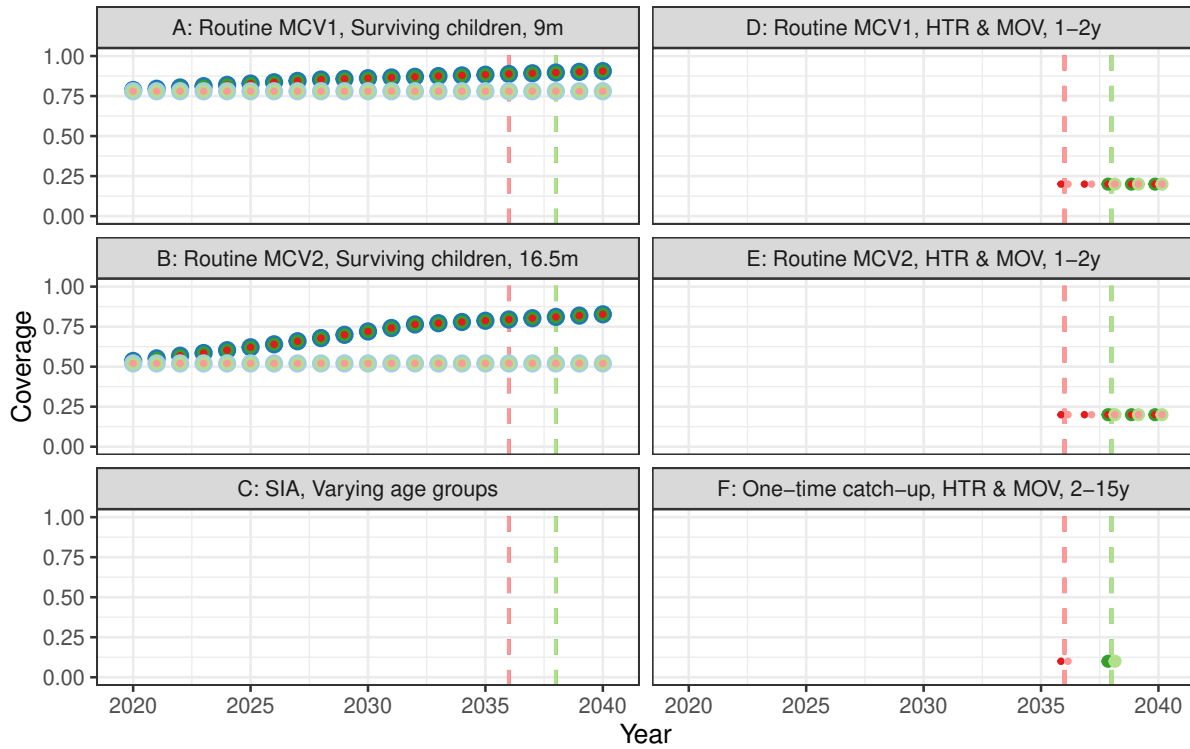

# Mozambique

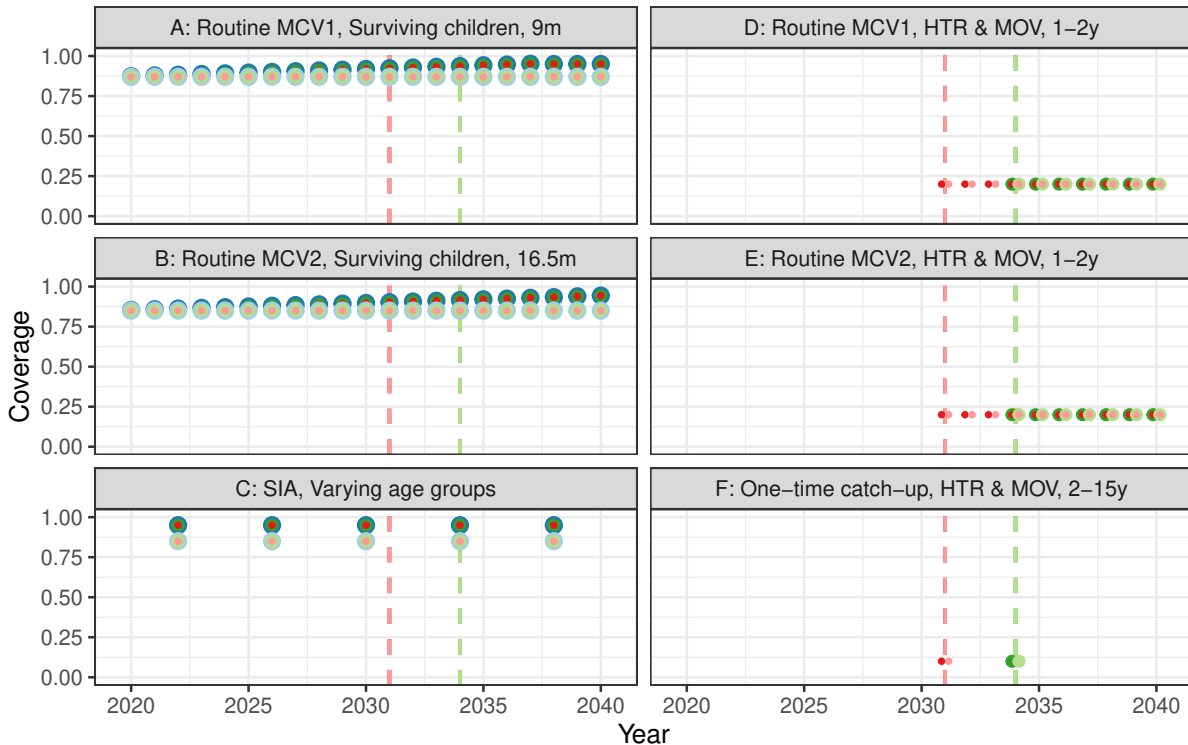

# Myanmar

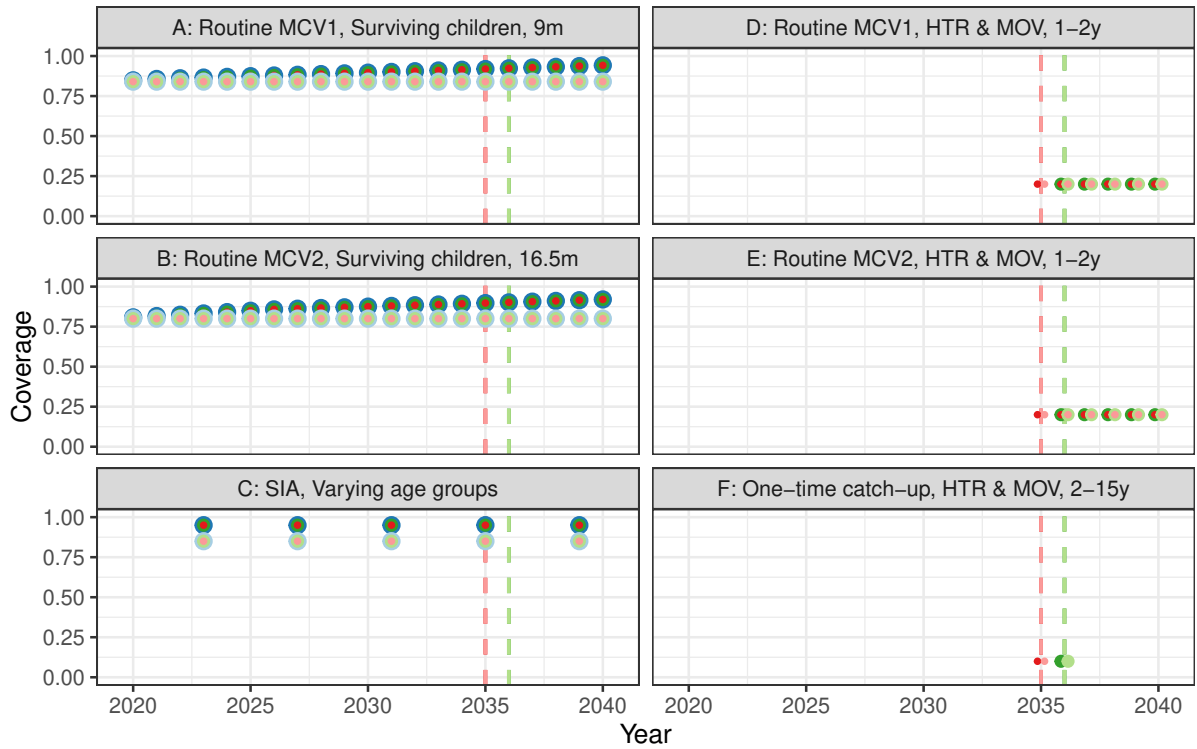



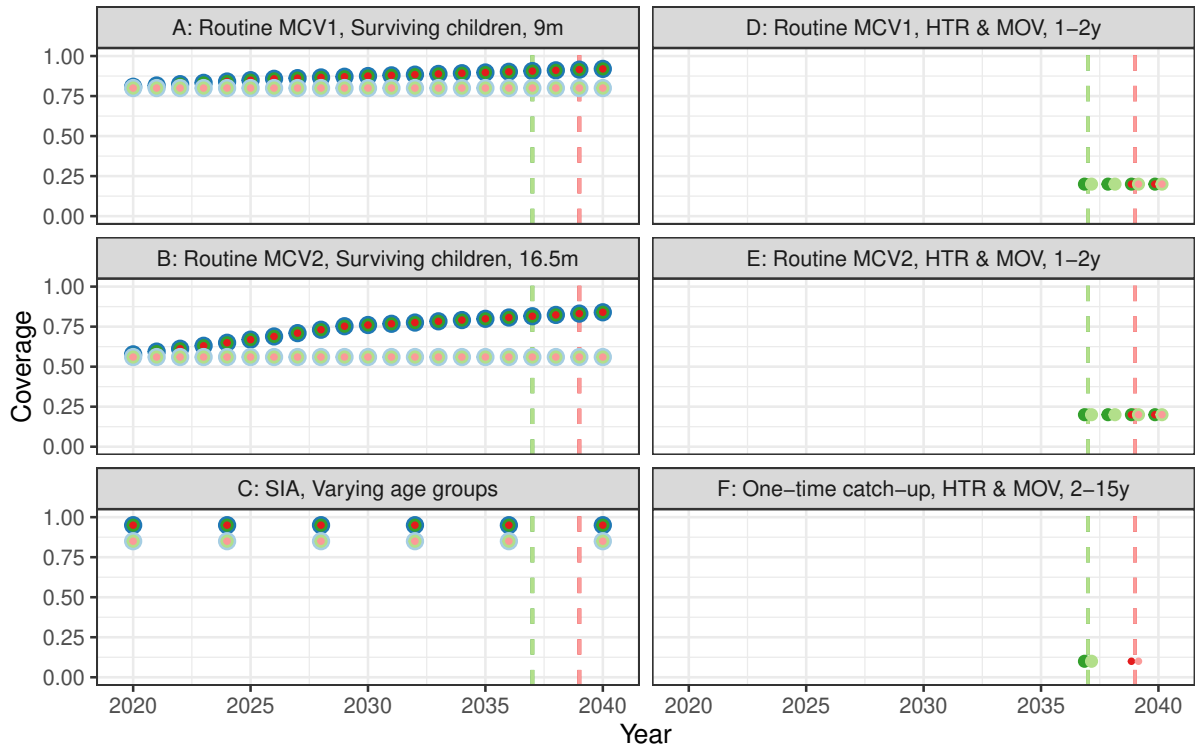

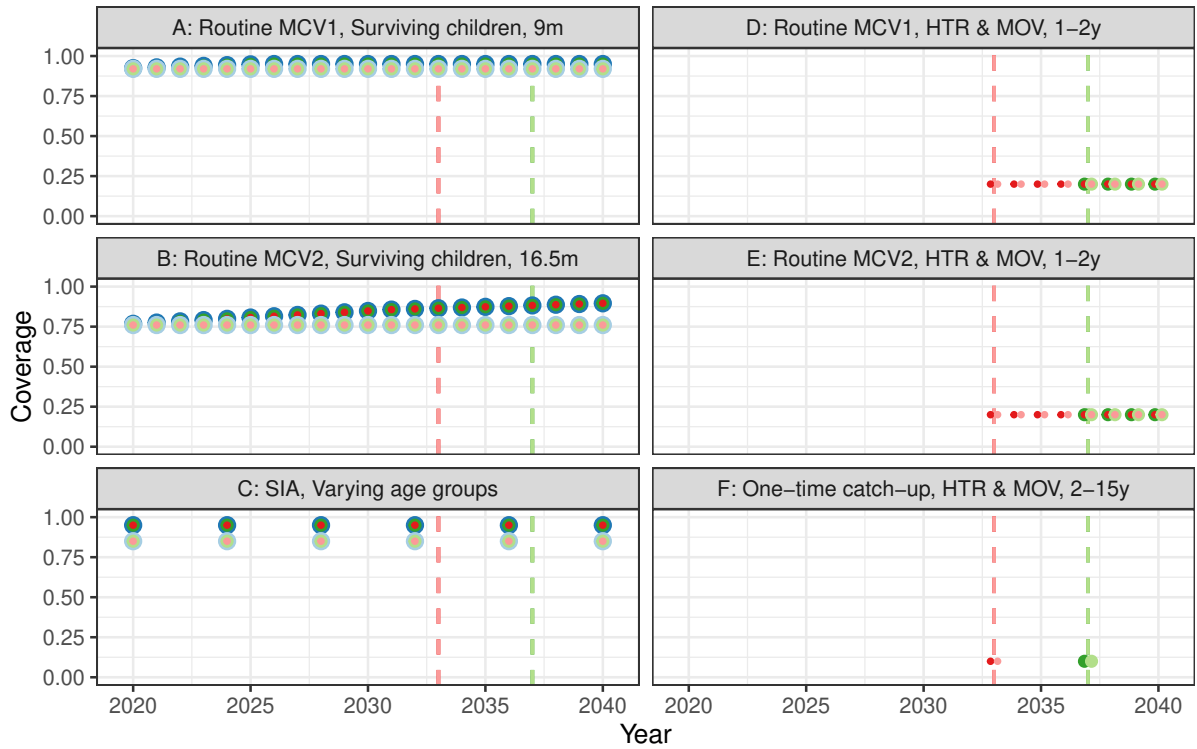

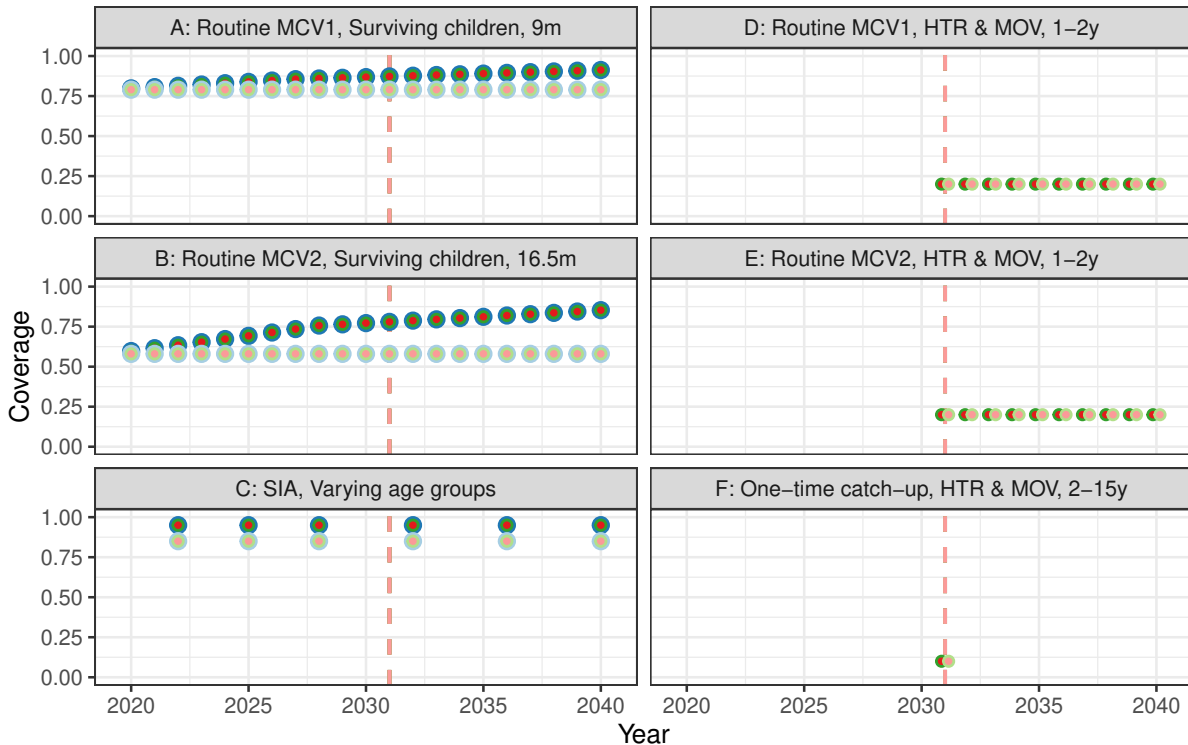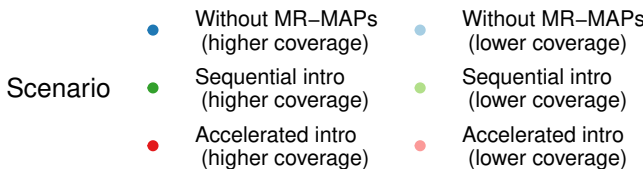

# Nigeria

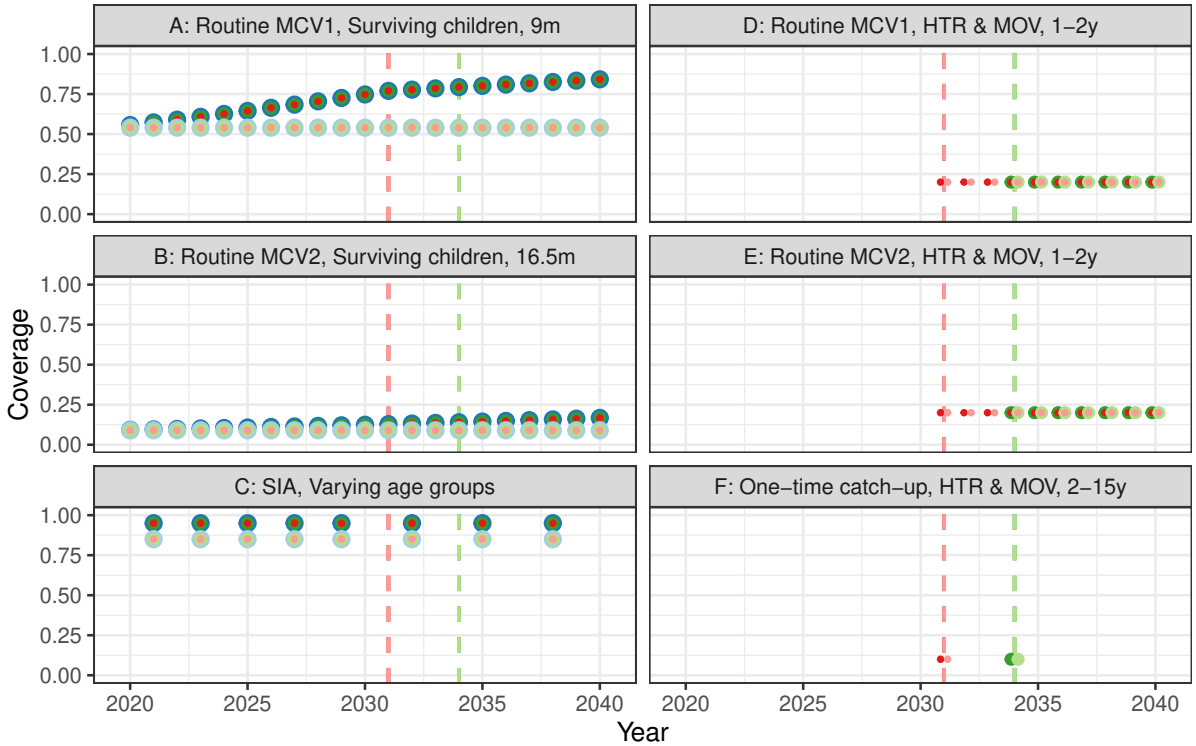

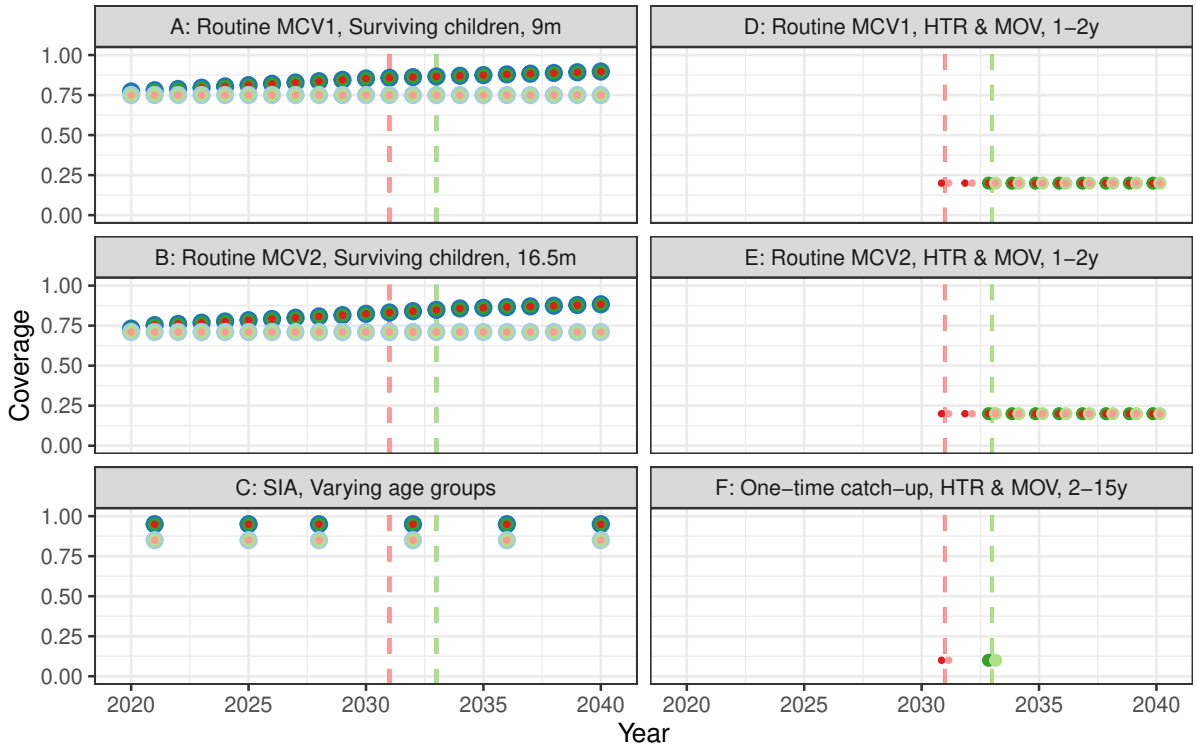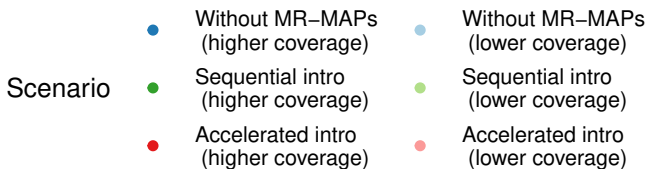

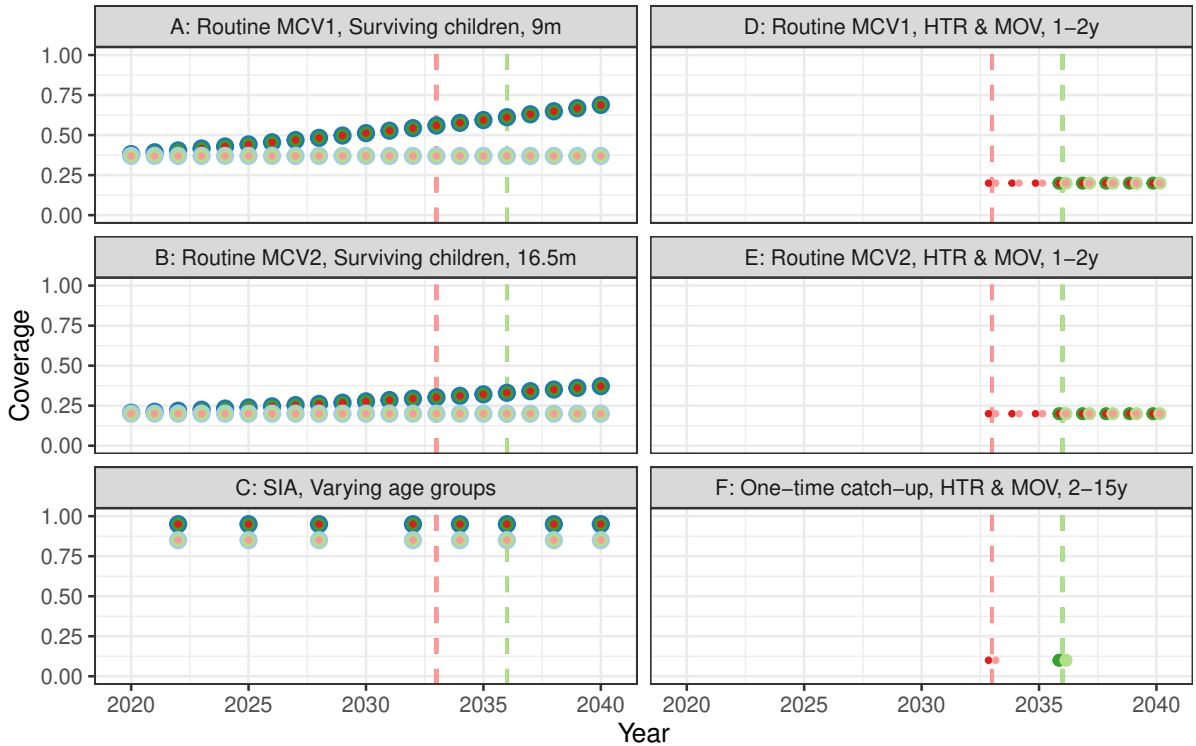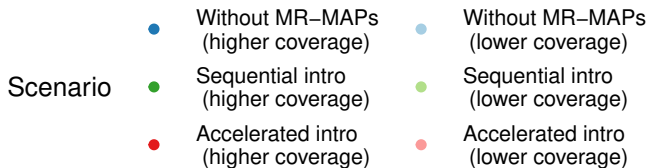

# Philippines

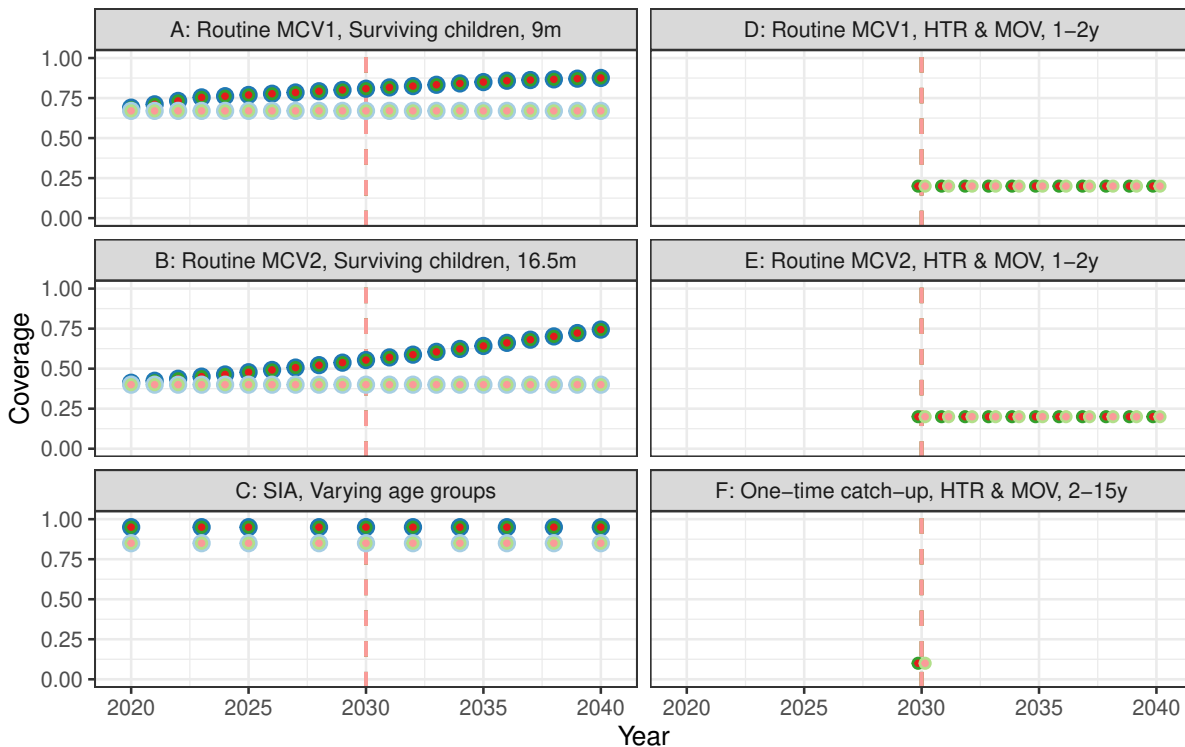

# Romania

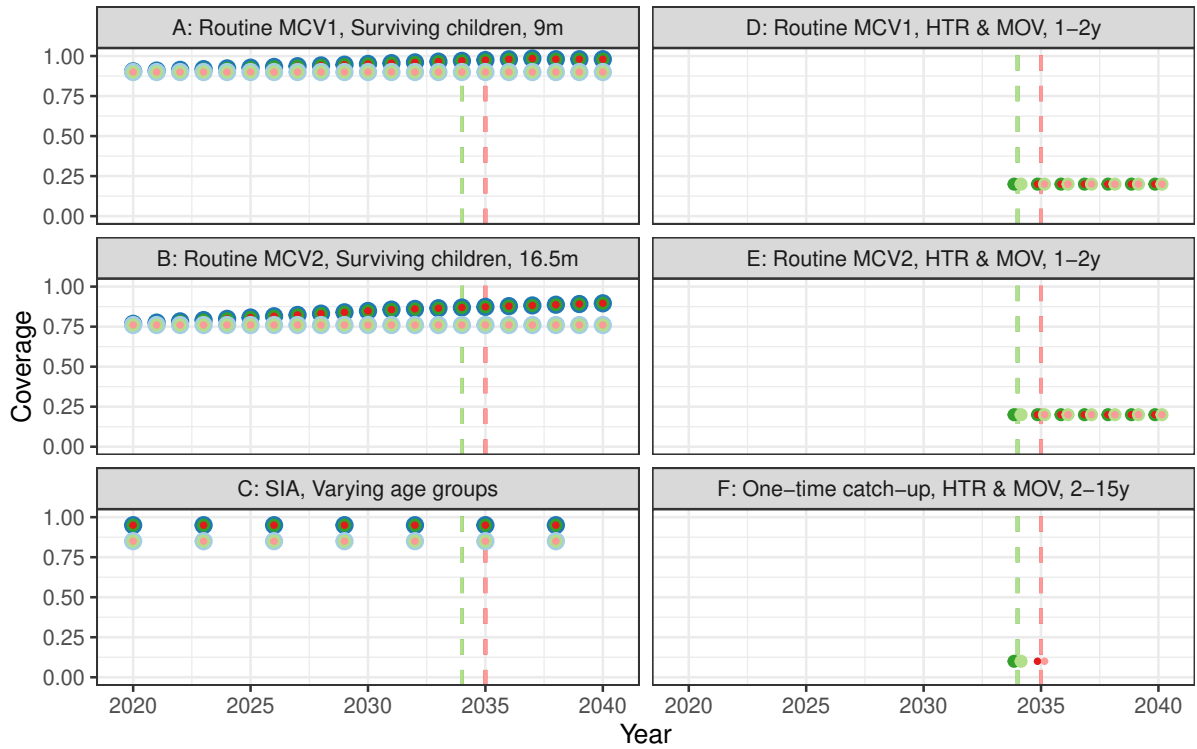



# Russian Federation

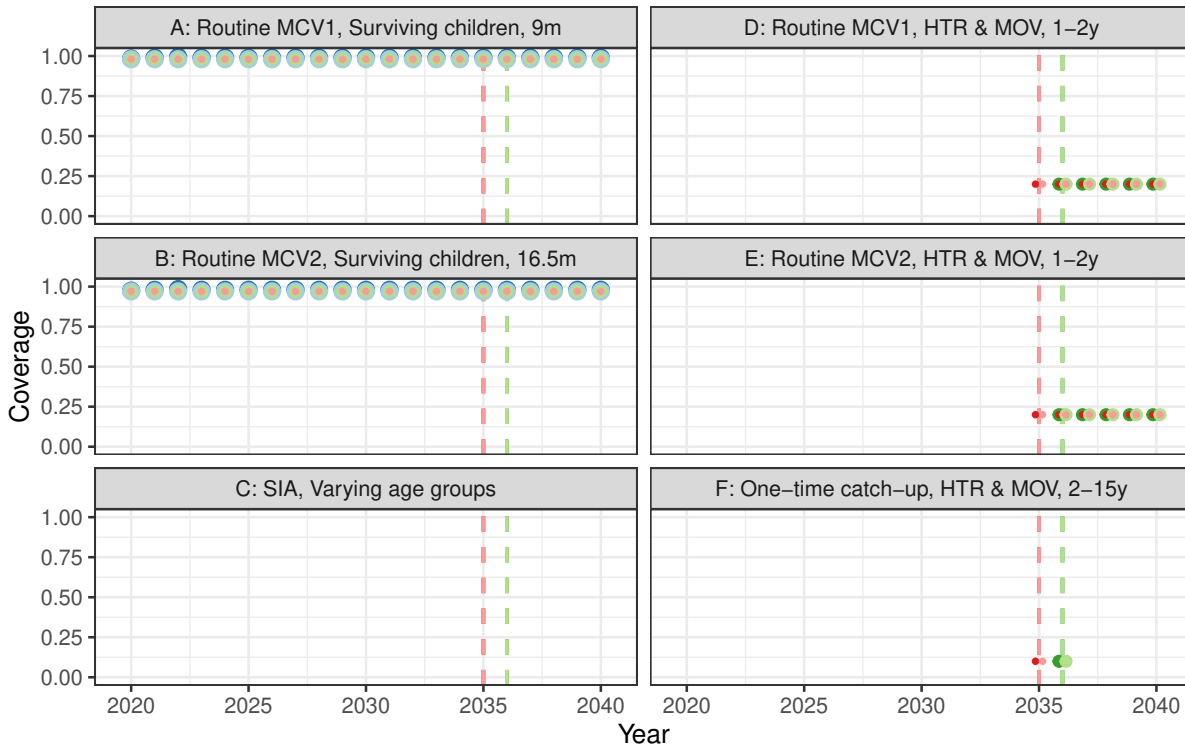

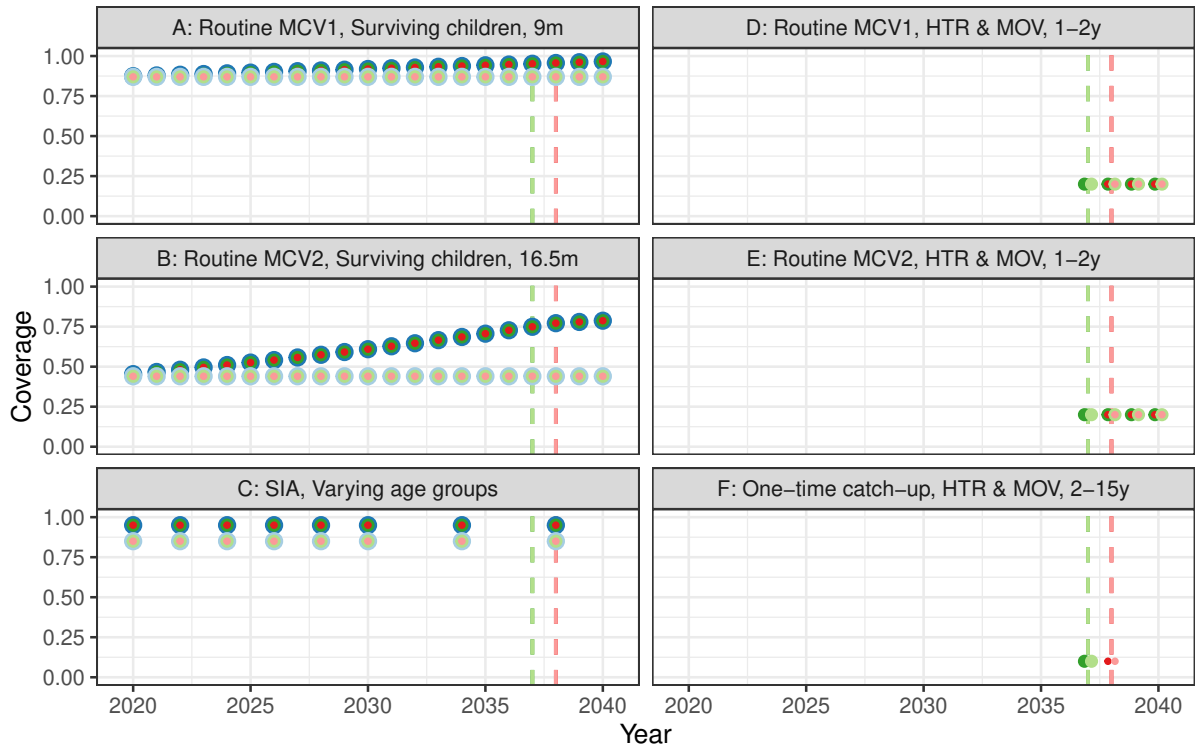

# Sao Tome and Principe

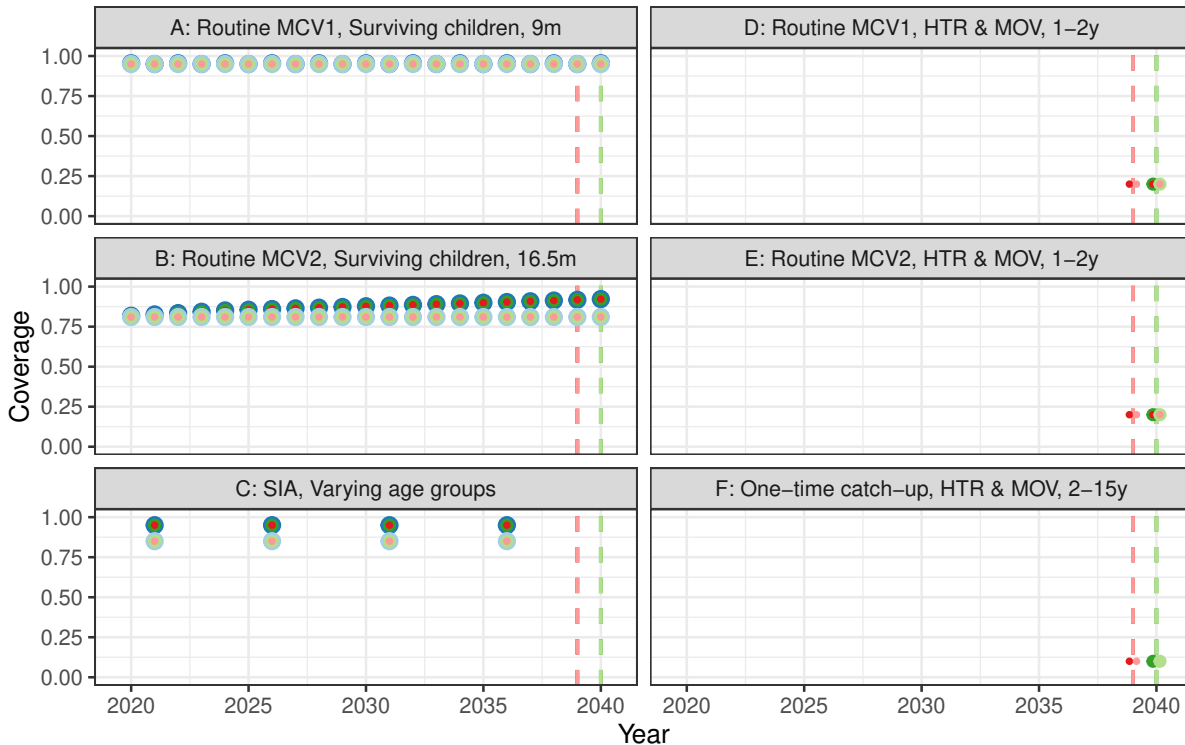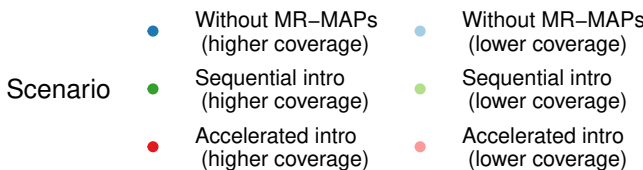

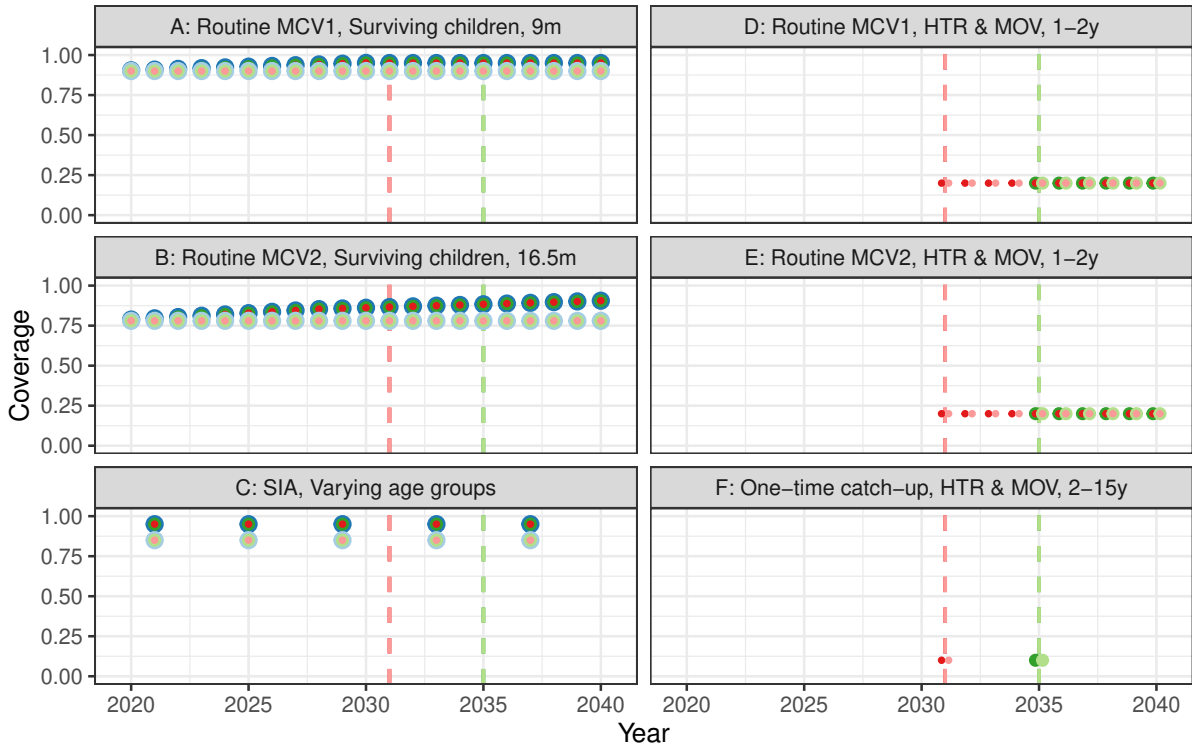

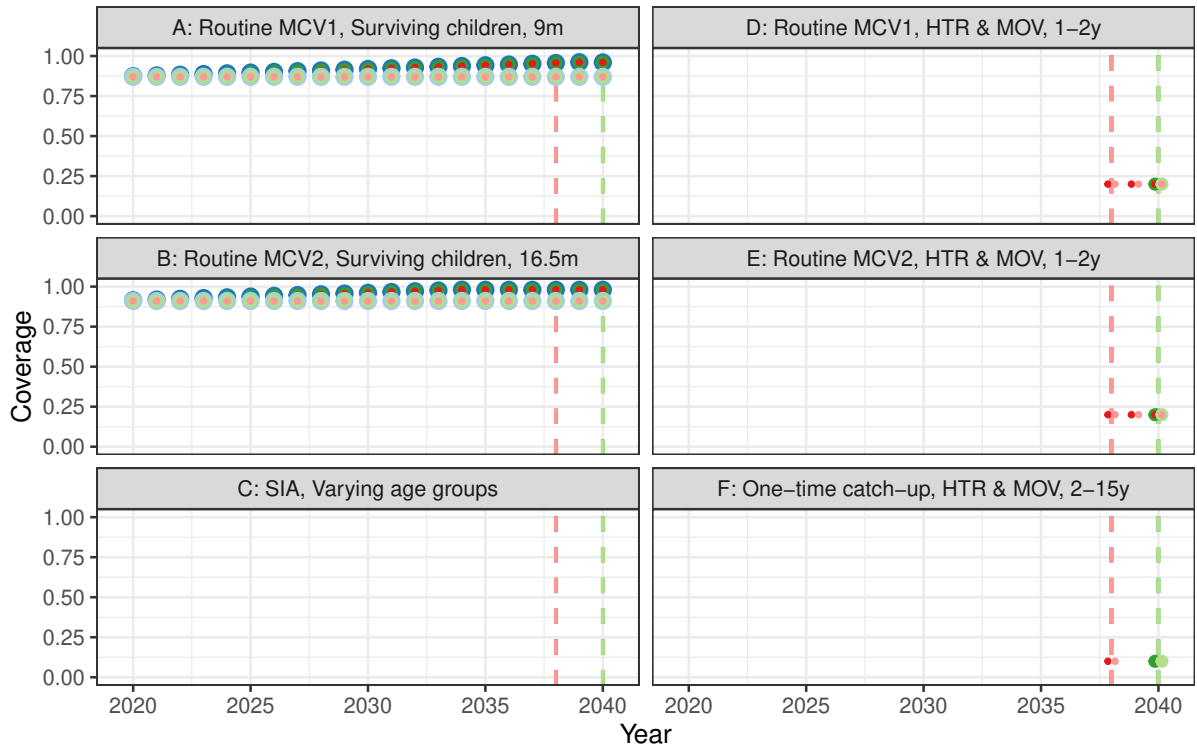

# Sierra Leone

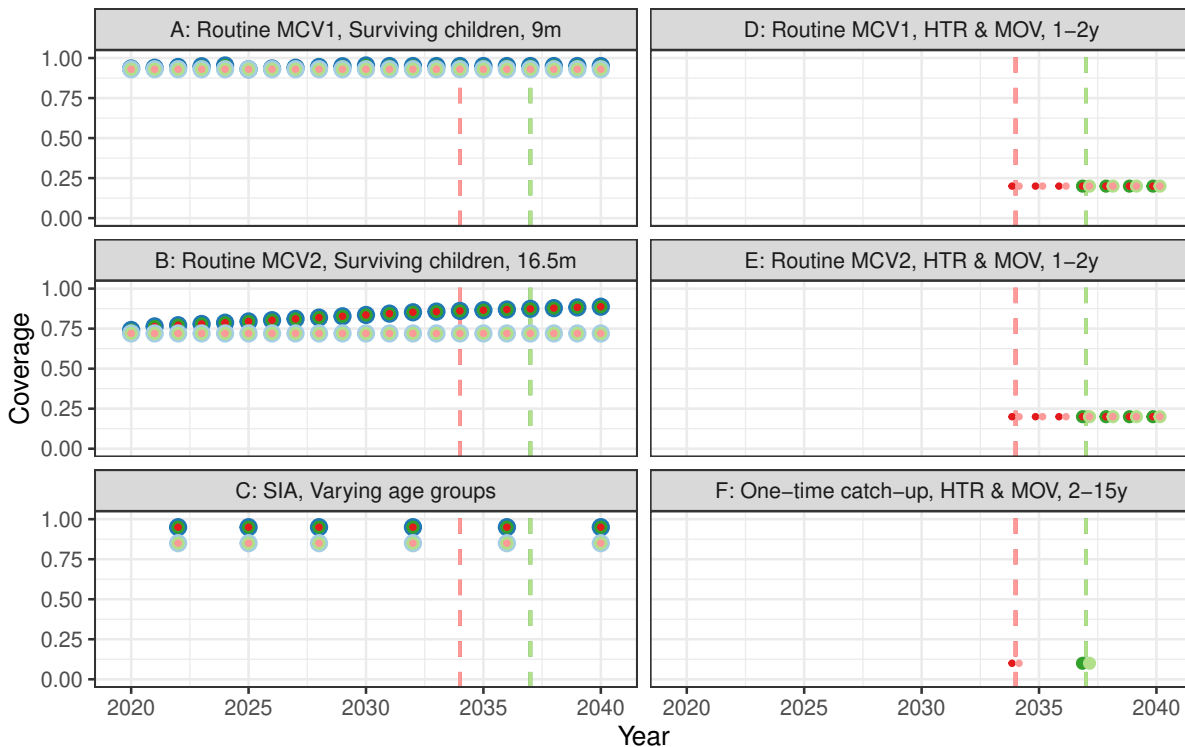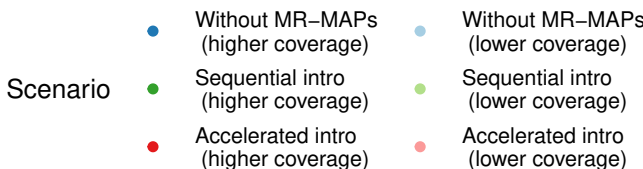

# Solomon Islands

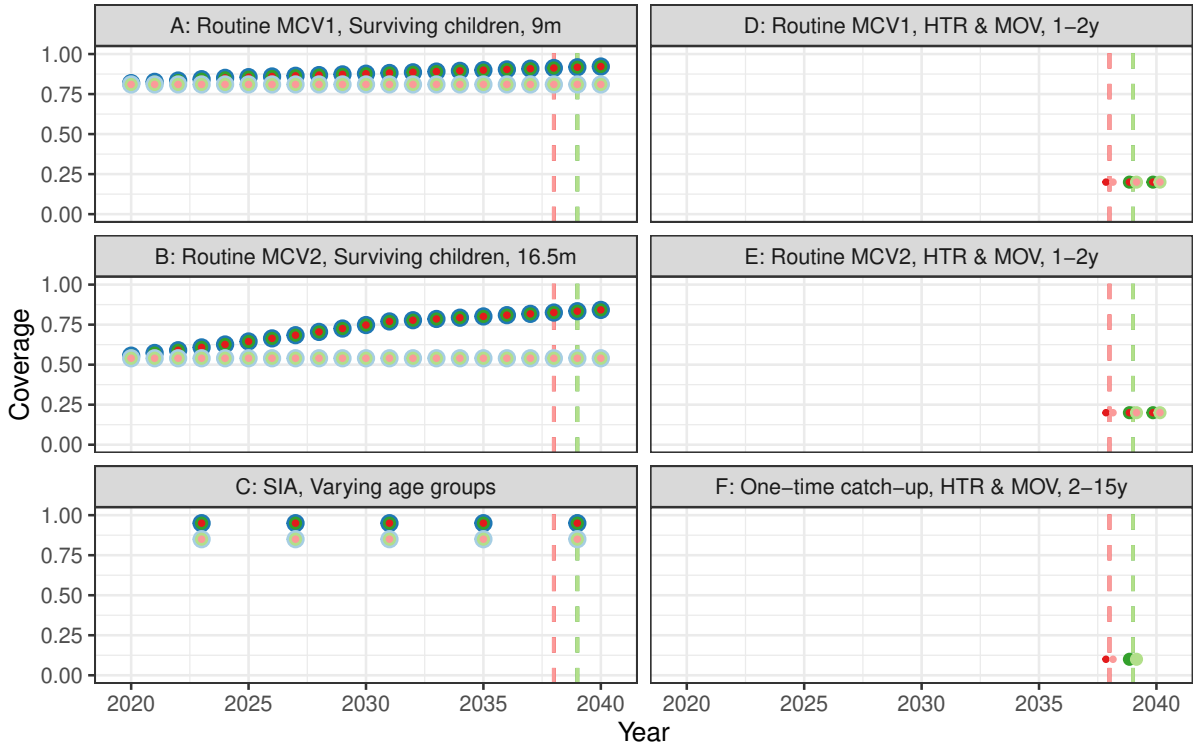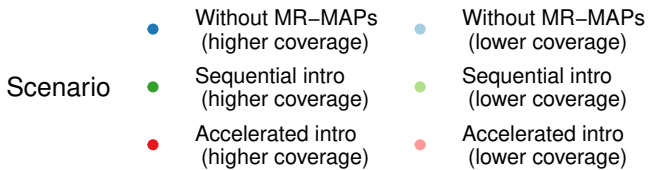

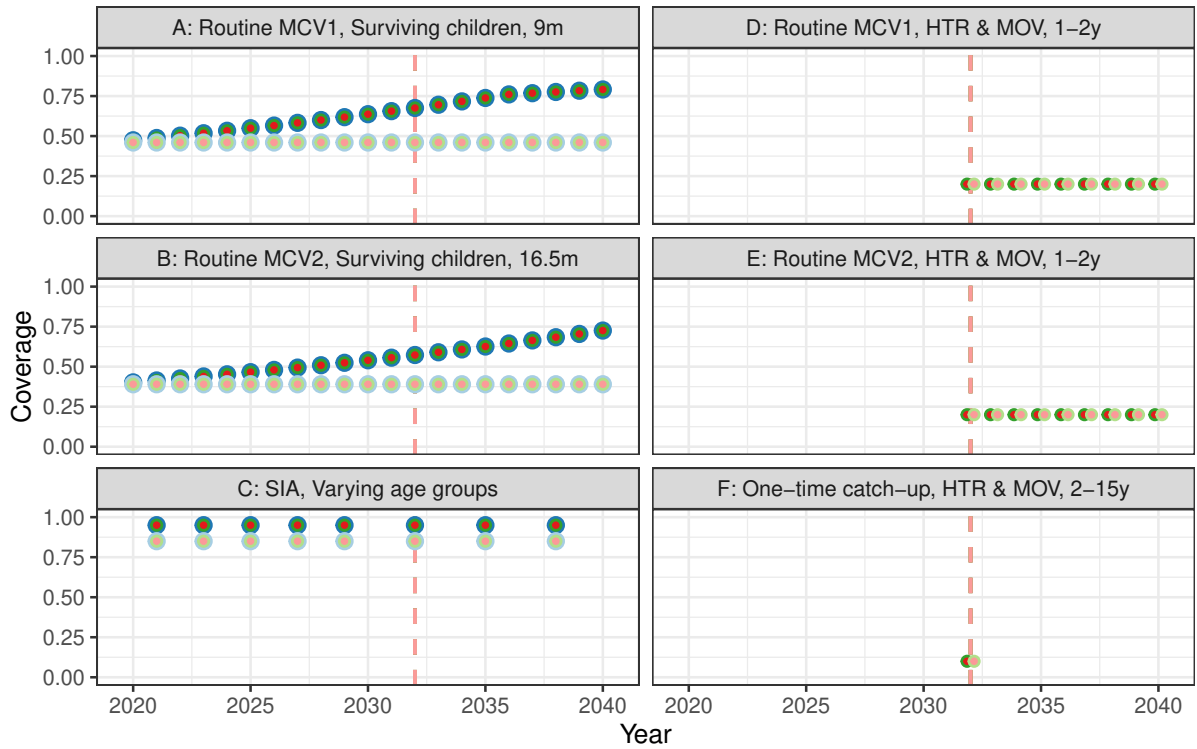



# South Africa

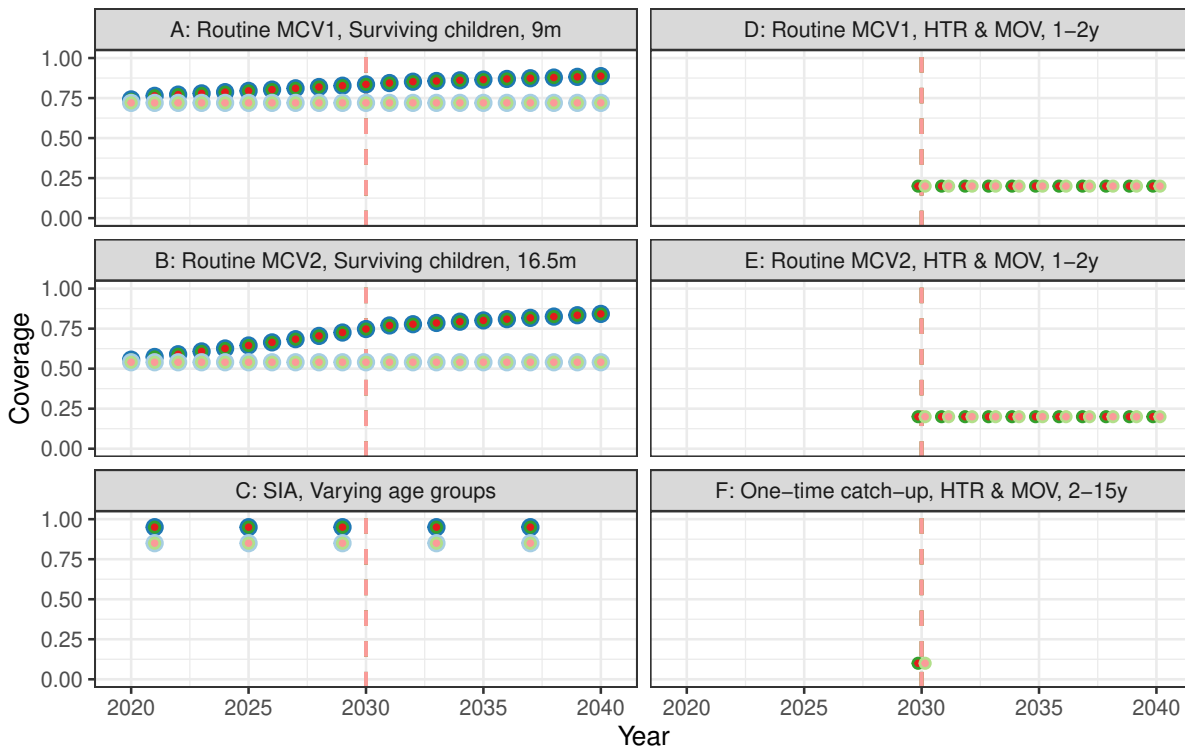

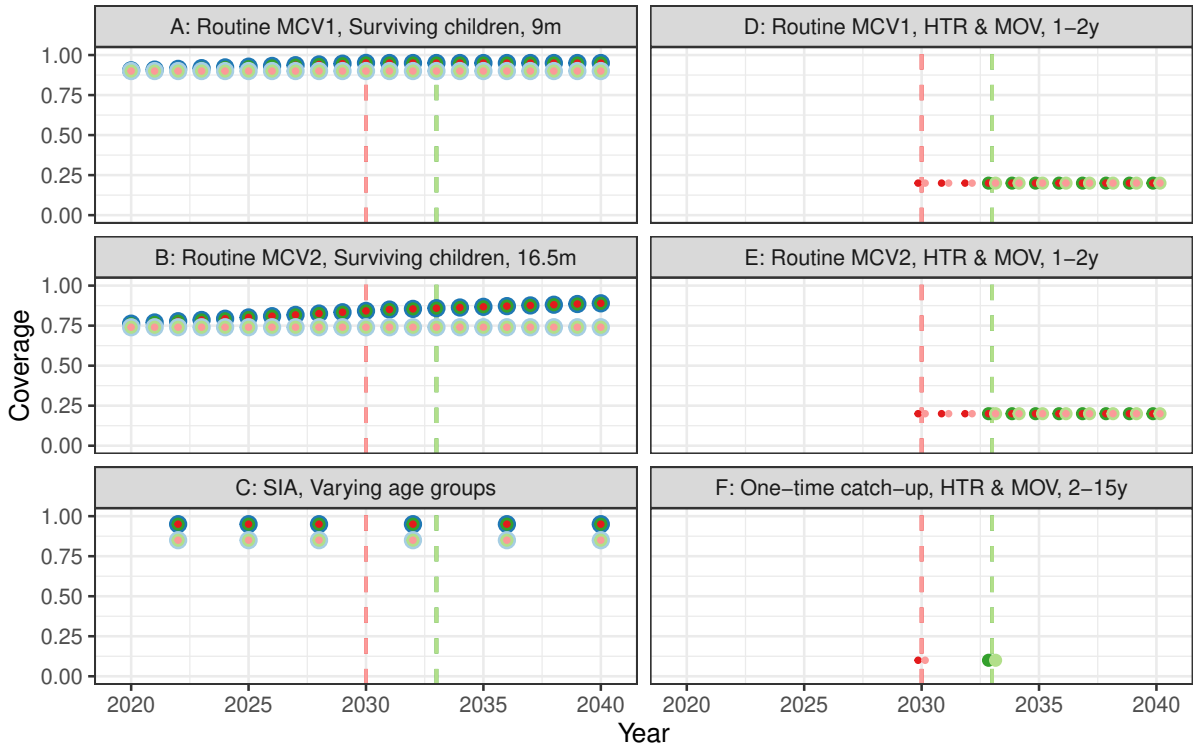

# Syrian Arab Republic

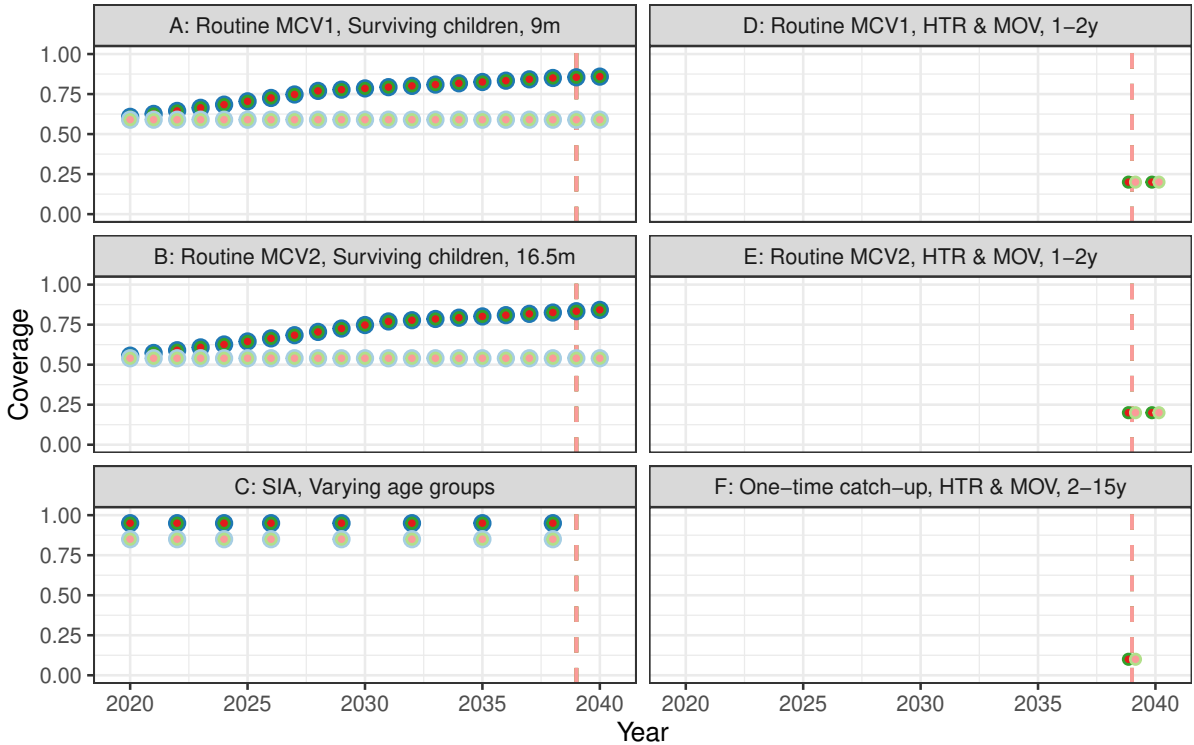

## United Republic of Tanzania

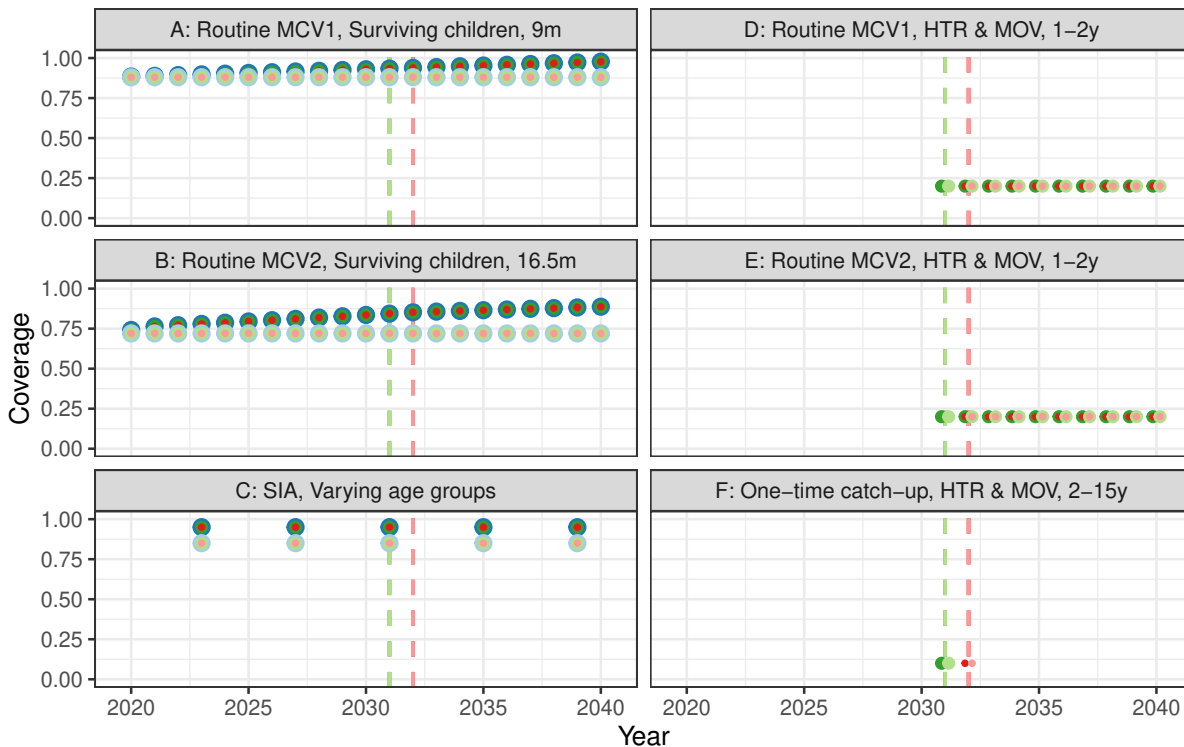

Togo

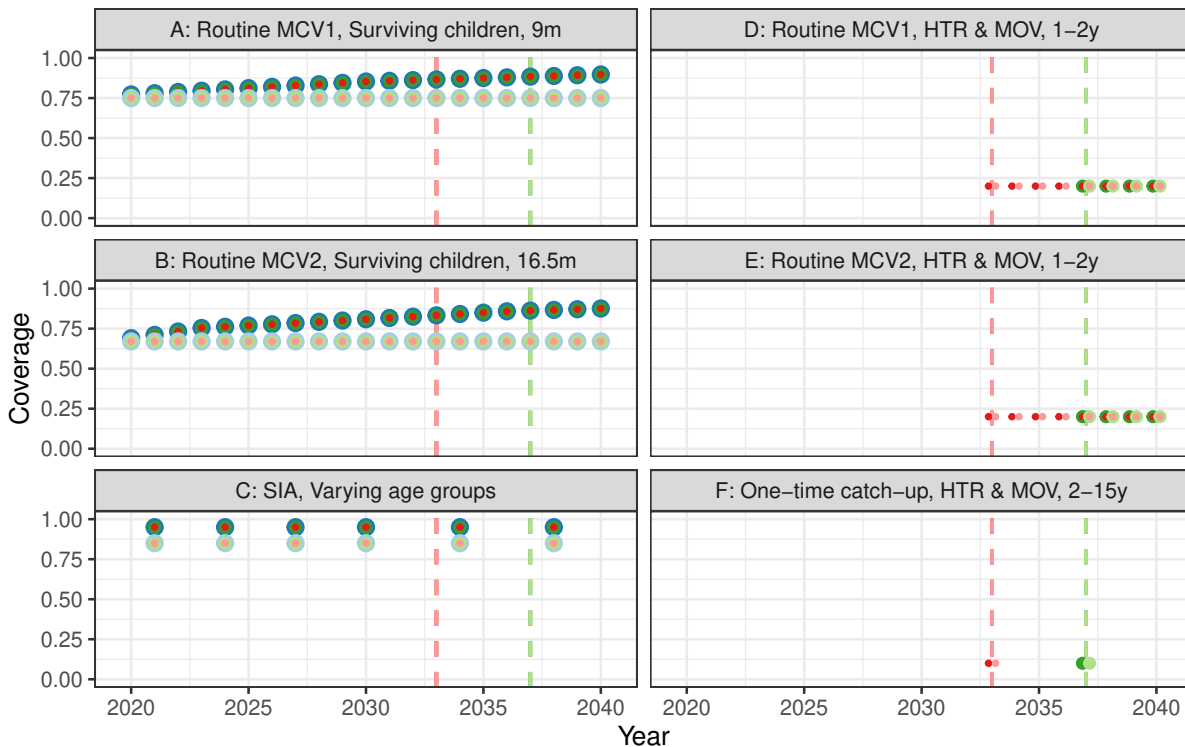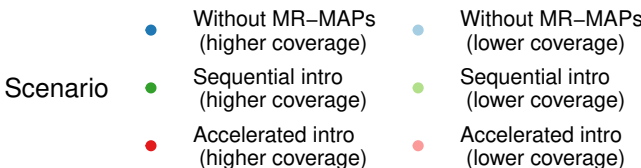

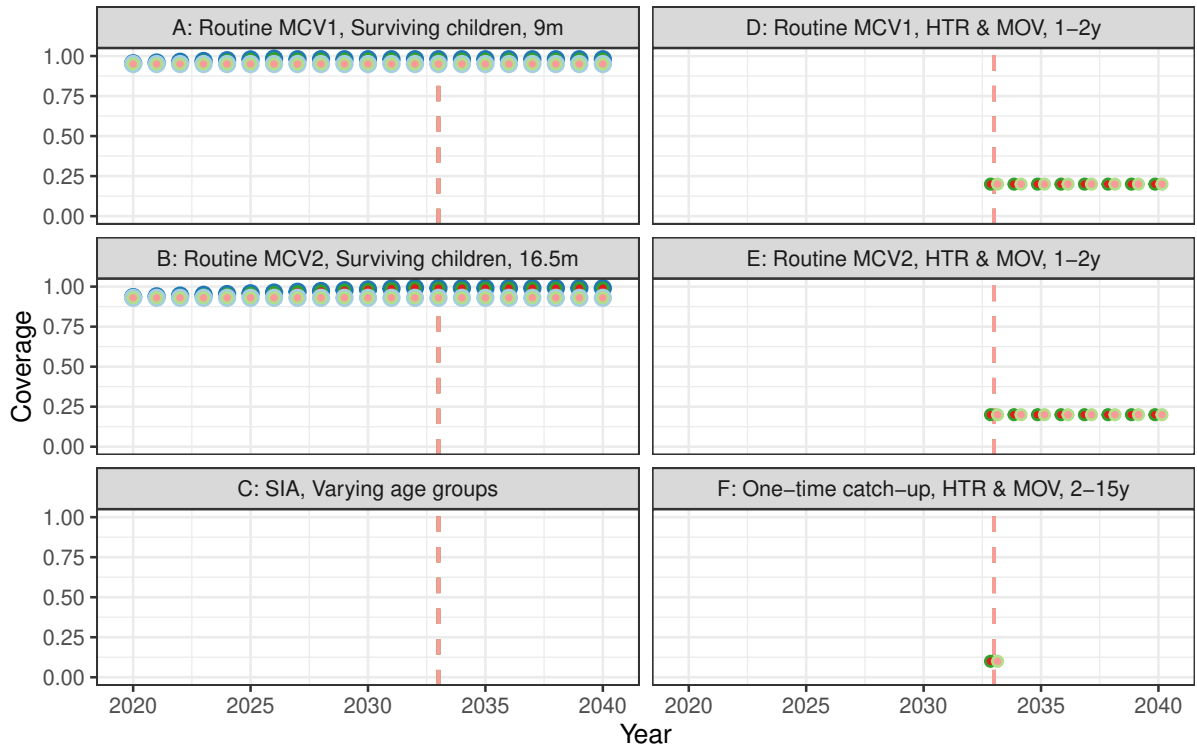

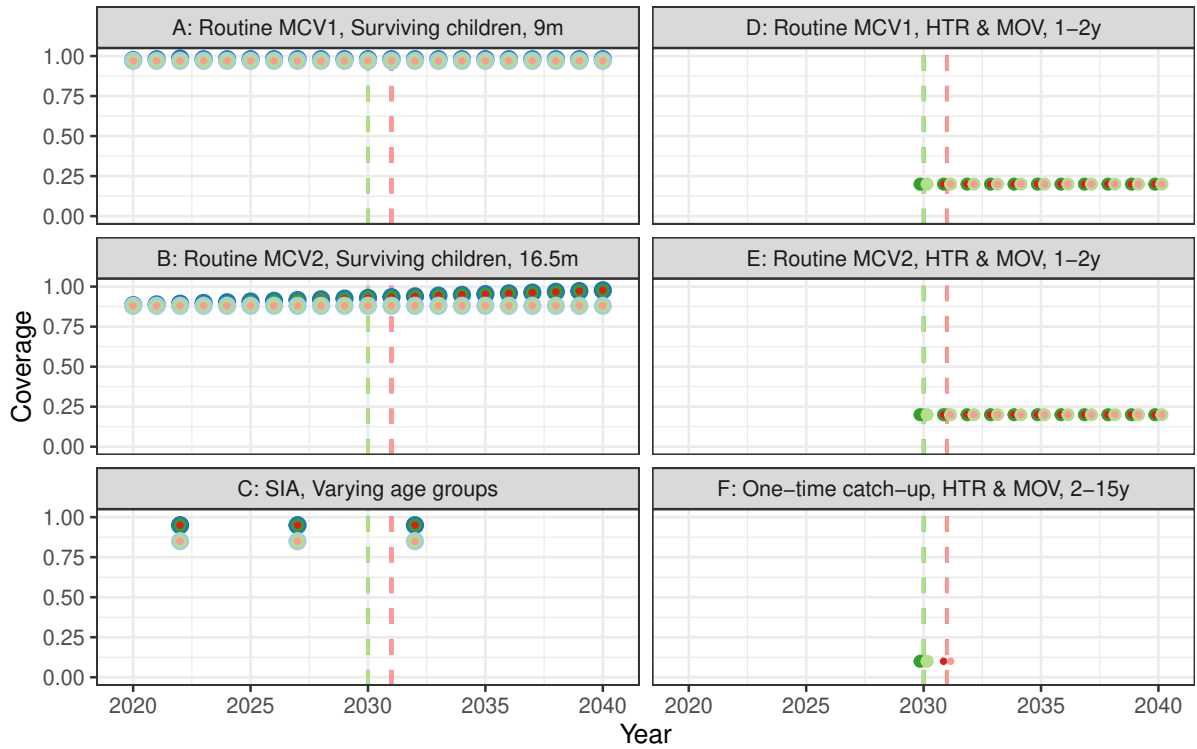

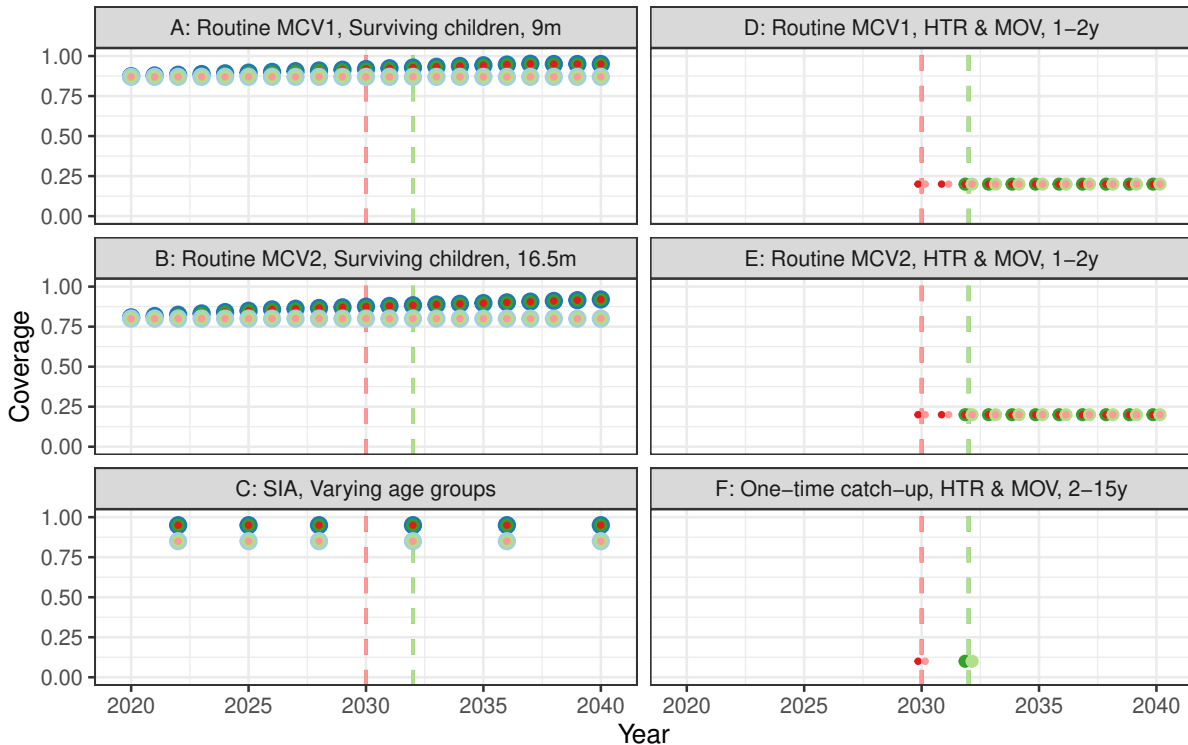



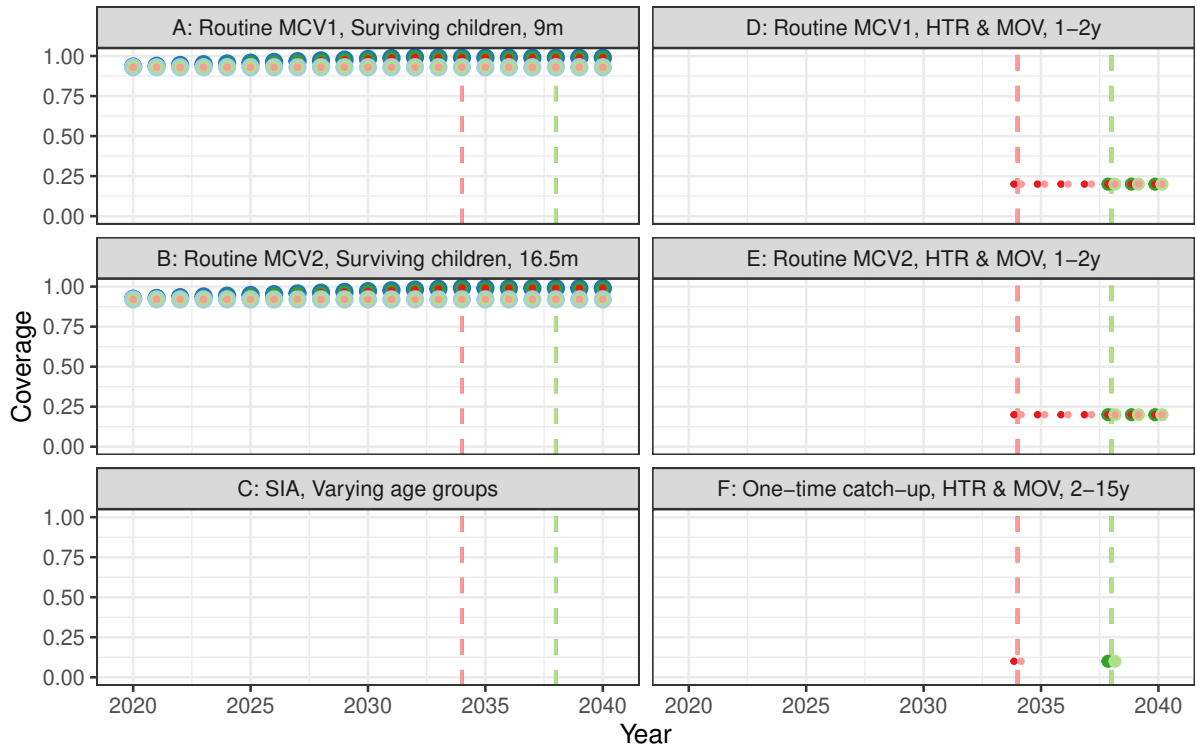

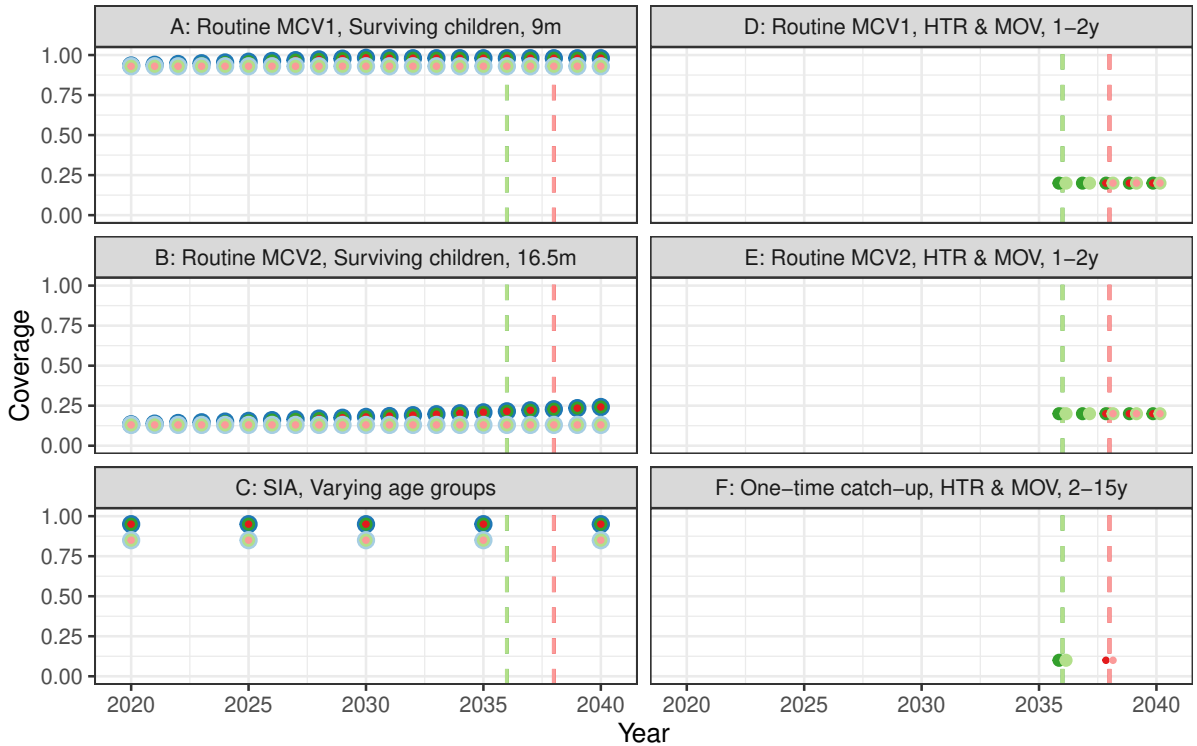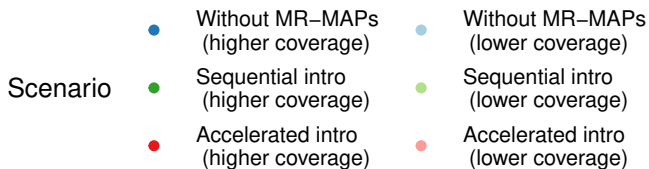

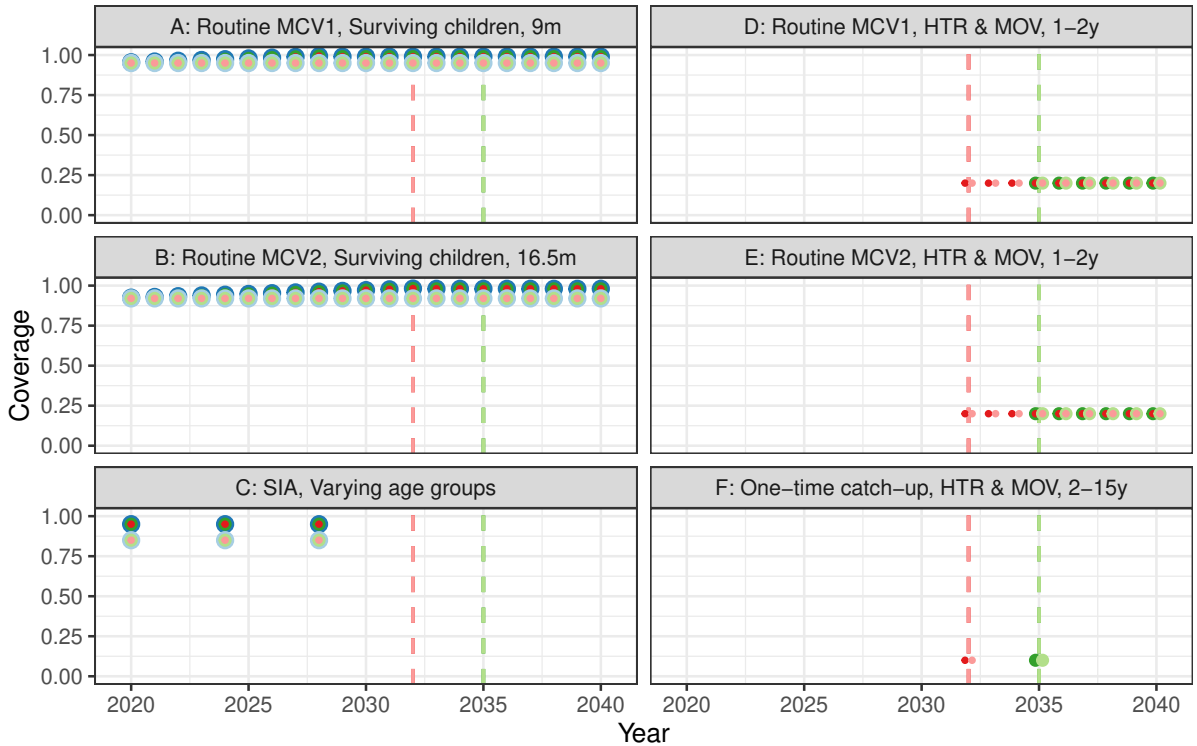

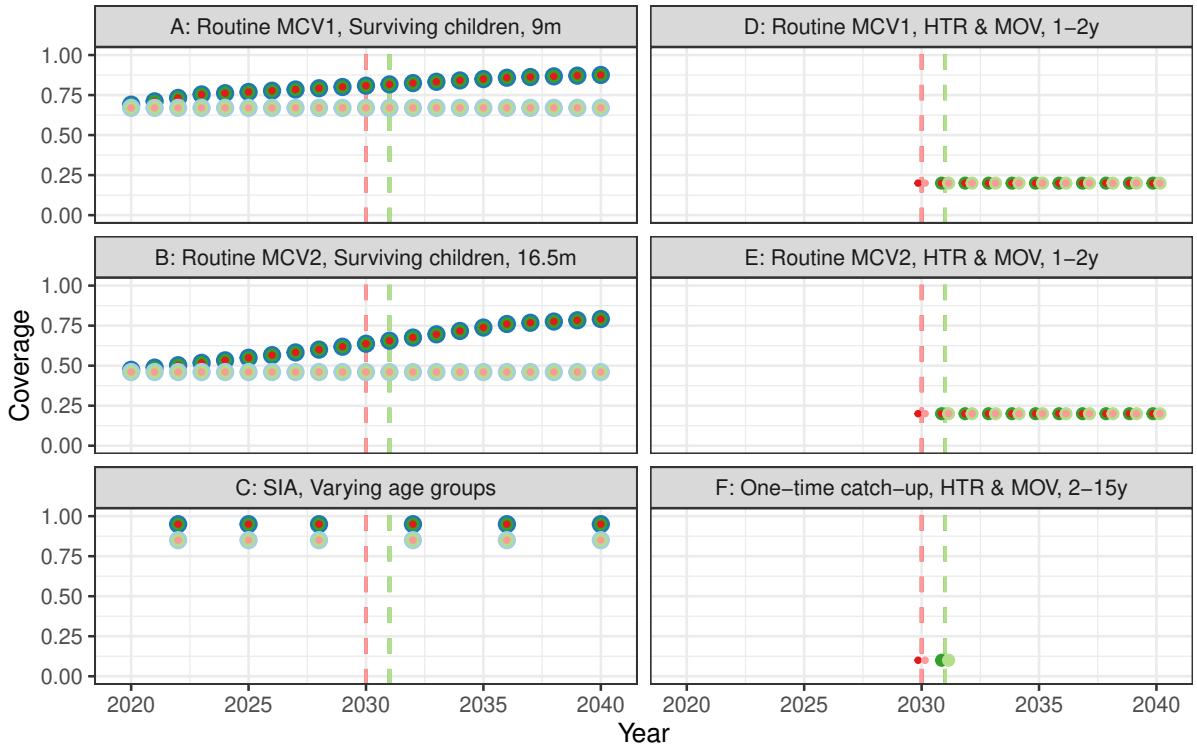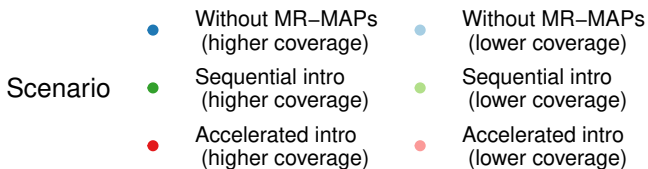

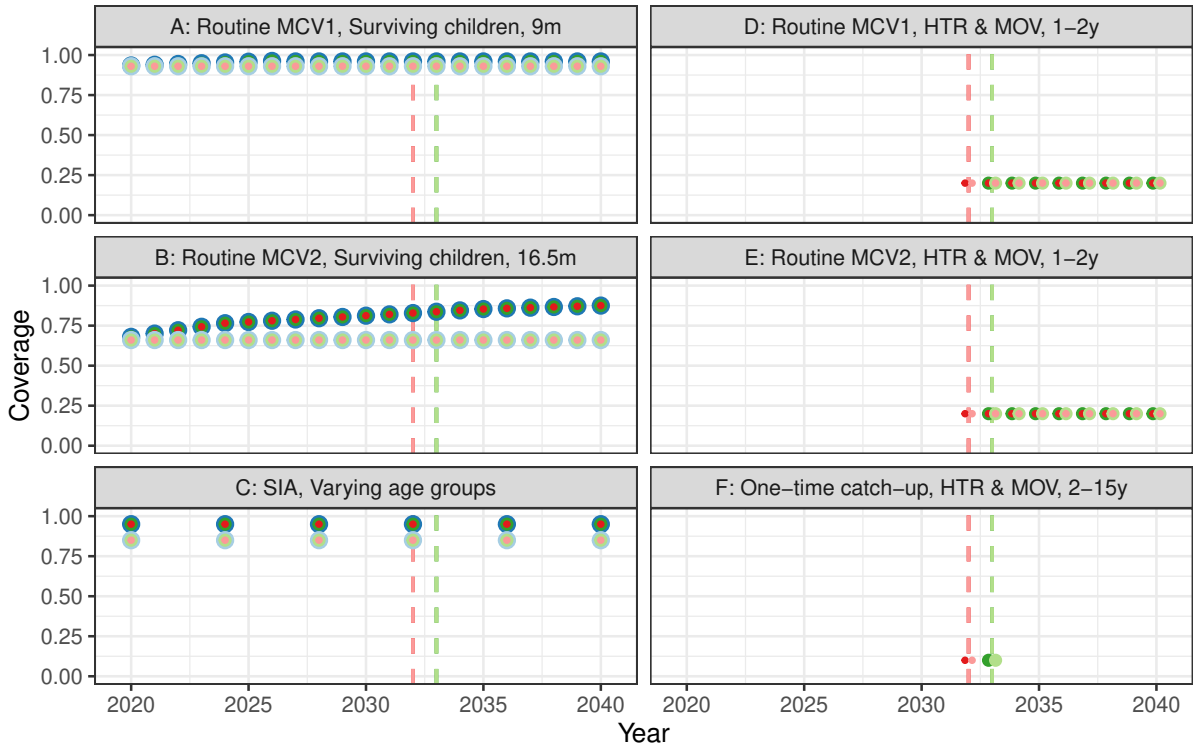

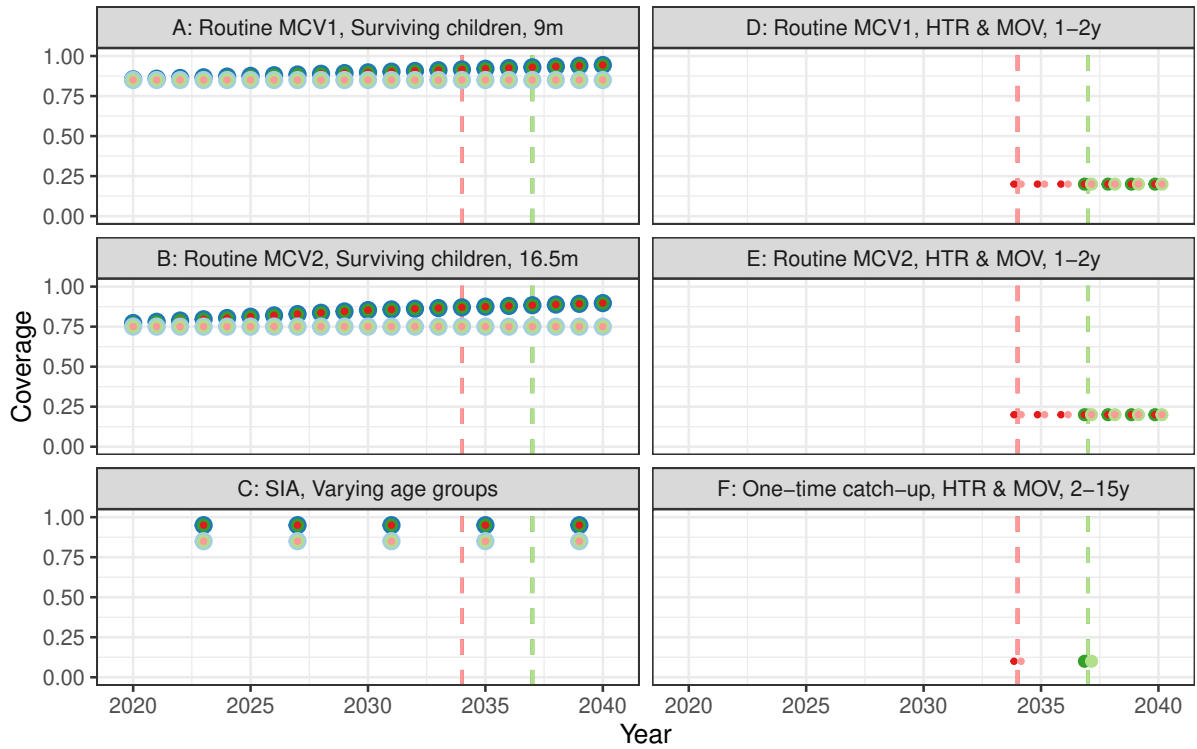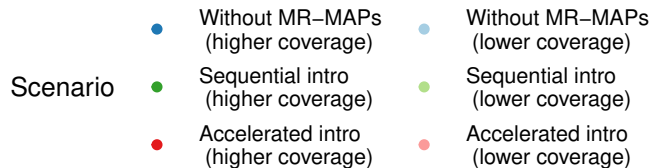

Supplement: bmjgh-2023-012204supp002.pdf [file bmjgh-2023-012204supp002.pdf]
